## Pollen morphology of the family Polygalaceae (Fabales)

HANNAH BANKS<sup>1\*</sup>, BENTE B. KLITGAARD<sup>2</sup>, FRANCES CLAXTON<sup>1</sup>, FELIX FOREST<sup>1</sup>  
and PETER R. CRANE<sup>3</sup>

<sup>1</sup>Royal Botanic Gardens, Kew, Richmond, Surrey TW9 3AB, UK

<sup>2</sup>Natural History Museum, Cromwell Road, London SW7 5BD, UK

<sup>3</sup>Department of Geophysical Sciences, University of Chicago, Chicago, IL 60637, USA

Received 1 November 2006; accepted for publication 15 August 2007

An overview of pollen morphology from all genera in the family Polygalaceae is presented to assist systematic studies of the Fabales clade. The pollen of 72 species, representing 18 genera, in Polygalaceae was examined using light microscopy and scanning electron microscopy. In addition, the pollen of eight species, representing seven genera, was examined using transmission electron microscopy. Pollen is described and illustrated for each genus, and the first pollen descriptions and publication of photomicrographs are presented for seven genera: *Balgoya*, *Barnhartia*, *Comesperma*, *Diclidanthera*, *Eriandra*, *Moutabea*, plus *Polygala* subgenus *Badiera*, and species previously included in *Nylandtia* (now in *Muraltia*). Pollen morphological similarities and differences broadly correspond with relationships suggested by recent molecular phylogenies. The aperture number was also found to correlate with trees generated using molecular data; early branching taxa have lower aperture numbers than later branching ones. The overall range of ectoaperture numbers seen in Polygalaceae, excluding *Balgoya*, is between five and 33. The pollen of *Balgoya* is tricolporate; all other genera have pollen with a range of ectoaperture numbers within each sample. The degree of endoaperture fusion to form endocingula is variable at a subgeneric level. All pollen is isopolar, except for that of *Heterosamara* and *Polygala wattersii*. © 2008 The Linnean Society of London, *Botanical Journal of the Linnean Society*, 2008, 156, 253–289.

ADDITIONAL KEYWORDS: apertures – endocingula – heteropolar – isopolar – Leguminosae – phylogeny – Quillajaceae – Surianaceae – systematics.

### INTRODUCTION

The monophyly of the Fabales clade *sensu* Angiosperm Phylogeny Group (APG) II (2003) is strongly supported by molecular sequence data (Morgan, Soltis & Robertson, 1994; Källersjö *et al.*, 1998; Doyle *et al.*, 2000; Savolainen *et al.*, 2000; Soltis *et al.*, 2000; Kajita *et al.*, 2001; Persson, 2001; Bello, Hawkins & Rudall, 2007). The clade consists of four families: Leguminosae, Polygalaceae, Quillajaceae, and Surianaceae. Some relationships amongst major groups within this clade are currently unresolved, but the family Polygalaceae is well supported as a monophyletic group by morphological data (Eriksen, 1993), *trnL-F* region sequence data (Persson, 2001), *rbcL*

and *trnL-F* region sequences (Forest, 2004; Forest *et al.*, 2007), and *rbcL* and *matK* sequences (Bello *et al.*, 2007). The Polygalaceae comprises 18–20 genera and over 1000 species (Brummitt, 1992; Maberley, 1997; Persson, 2001) (Table 1). Members of the Polygalaceae are almost cosmopolitan in distribution, but are absent from New Zealand and Polynesia. Life forms include trees, shrubs, lianes, herbs, and parasites.

The pollen morphology of the Fabales clade is the subject of ongoing research at the Royal Botanic Gardens, Kew (for example, see Banks & Klitgaard, 2000; Banks *et al.*, 2003 for caesalpinoid legume pollen studies, and Claxton *et al.*, 2005 for a comprehensive account of Surianaceae and Quillajaceae pollen). A particular focus is to resolve phylogenetic relationships between the early diverging lineages of the Fabales clade. This study set out to examine and

\*Corresponding author. E-mail: h.banks@kew.org

**Table 1.** Number of species recognized per genus, species sampled for pollen morphology in this study, and summary of previous Polygalaceae pollen literature

| Genus                | Number of species        | Number of species sampled in this study | Specimens examined in this study<br>Key to herbaria: K, RBG Kew; MEXU, Mexico; NSW, RBG Sydney                                                                                                                                                                                          | Descriptions in the pollen literature | Drawings in the pollen literature | LM images in the pollen literature | SEM images in the pollen literature | TEM images in the literature | Polygalaceae pollen literature |
|----------------------|--------------------------|-----------------------------------------|-----------------------------------------------------------------------------------------------------------------------------------------------------------------------------------------------------------------------------------------------------------------------------------------|---------------------------------------|-----------------------------------|------------------------------------|-------------------------------------|------------------------------|--------------------------------|
| <i>Aroxima</i>       | 2 <sup>1</sup>           | 2                                       | <i>A. afzeliana</i> Stapf, Aushoff 513, Ivory Coast, K; <i>A. liberia</i> Stapf, Breteler 5910, Ivory Coast, K                                                                                                                                                                          | ✓                                     |                                   | ✓                                  |                                     |                              | 21                             |
| <i>Balgoya</i>       | 1 <sup>2,3</sup>         | 1                                       | <i>Ba. pacifica</i> Morat & Meijden, McPherson 3394; McKee 24667, New Caledonia, K; <i>Ba. pacifica</i> , McPherson 3374, McPherson 3394, New Caledonia, NSW                                                                                                                            |                                       |                                   |                                    |                                     |                              | None                           |
| <i>Barnhartia</i>    | 1 <sup>7,10</sup>        | 1                                       | <i>Bm. floribunda</i> Gleason, Broom <i>et al.</i> 8594, Brazil, K                                                                                                                                                                                                                      |                                       |                                   |                                    |                                     |                              | 8                              |
| <i>Bredemeyera</i>   | 15–60 <sup>4,10,16</sup> | 3                                       | <i>Br. lucida</i> (Benth.) Benn., Ratter <i>et al.</i> R.6182, Brazil, E; <i>Br. microphylla</i> Hieron., Maas <i>et al.</i> 8181, Argentina, K; <i>Br. papuana</i> Steen., Ridsdale and Galore 33380, New Guinea, K                                                                    | ✓                                     | ✓                                 |                                    | ✓                                   |                              | 22,23,24                       |
| <i>Carpolobia</i>    | 4 <sup>1</sup>           | 2                                       | <i>C. alba</i> G. Don, Troupin 3888, Republic of Congo, K; <i>C. goetzii</i> Gürke, Goyder <i>et al.</i> 3722, Tanzania, K                                                                                                                                                              | ✓                                     |                                   | ✓                                  |                                     |                              | 25,26,27,28,29                 |
| <i>Comesperma</i>    | 24 <sup>17</sup>         | 5                                       | <i>Co. calymega</i> Labill., R.M.L.G. 4274, Australia, K; <i>Co. ericinum</i> DC., Adams 1480, Australia, K; <i>Co. hispidum</i> Pedley, Jobson 5008, Australia, NSW; <i>Co. virgatum</i> Labill., Strid. 21356, Australia, K; <i>Co. volubile</i> Labill., Milligan s.n., Australia, K | ✓                                     |                                   |                                    |                                     |                              | 30                             |
| <i>Diclidanthera</i> | 4–7 <sup>4,7,10</sup>    | 1                                       | <i>D. penduliflora</i> Mart., Prance <i>et al.</i> 24657, Peru, K                                                                                                                                                                                                                       | ✓                                     |                                   |                                    |                                     |                              | 31,32                          |

|                     |                           |   |   |   |   |                |
|---------------------|---------------------------|---|---|---|---|----------------|
| <i>Epirixanthes</i> | 5–6 <sup>6,18</sup>       | 2 | ✓ | ✓ | ✓ | 33,34          |
|                     |                           |   |   |   |   |                |
| <i>Eriandra</i>     | 1 <sup>6,8</sup>          | 1 | ✓ | ✓ | ✓ | 34             |
|                     |                           |   |   |   |   |                |
| <i>Heterosamara</i> | 14 <sup>19</sup>          | 4 | ✓ | ✓ | ✓ | 20             |
|                     |                           |   |   |   |   |                |
| <i>Monnina</i>      | c. 150 <sup>4,10,13</sup> | 3 | ✓ | ✓ | ✓ | 30,31,32,35,36 |
|                     |                           |   |   |   |   |                |
| <i>Moutabea</i>     | 8–10 <sup>4,9,10</sup>    | 1 | ✓ | ✓ | ✓ | None           |
|                     |                           |   |   |   |   |                |
| <i>Muraltia</i>     | 115–117 <sup>14</sup>     | 7 | ✓ | ✓ | ✓ | 31,32,36,37    |
|                     |                           |   |   |   |   |                |
| <i>Nylandtia</i>    | 21 <sup>11,14,20</sup>    | 1 | ✓ | ✓ | ✓ | 30             |

Table 1. *Continued*

| Genus           | Number of species              | Number of species sampled in this study | Specimens examined in this study                                                                                                                                                                                                                                                                                                                                                                                                                                                                                                                                                                                                                                                                                                                                                                                                                                                                                                                                                                                                                                                                                                                                                                                                                                                                                                                                                                                                                                                                             | Key to herbaria: K, RBG Kew; MEXU, Mexico; NSW, RBG Sydney | Descriptions in the pollen literature | Drawings in the pollen literature | LM images in the pollen literature | SEM images in the pollen literature | TEM images in the literature | Polygalaceae pollen literature |             |
|-----------------|--------------------------------|-----------------------------------------|--------------------------------------------------------------------------------------------------------------------------------------------------------------------------------------------------------------------------------------------------------------------------------------------------------------------------------------------------------------------------------------------------------------------------------------------------------------------------------------------------------------------------------------------------------------------------------------------------------------------------------------------------------------------------------------------------------------------------------------------------------------------------------------------------------------------------------------------------------------------------------------------------------------------------------------------------------------------------------------------------------------------------------------------------------------------------------------------------------------------------------------------------------------------------------------------------------------------------------------------------------------------------------------------------------------------------------------------------------------------------------------------------------------------------------------------------------------------------------------------------------------|------------------------------------------------------------|---------------------------------------|-----------------------------------|------------------------------------|-------------------------------------|------------------------------|--------------------------------|-------------|
| <i>Polygala</i> | c. 500 <sup>4,6,10,15,19</sup> | 23                                      | <p><i>Badiera acuminata</i> DC., Boom 4055, Bolivia, K;</p> <p><i>B. caracasana</i> (Kunth) C. Persson, 4796, Ecuador, K;</p> <p><i>B. diversifolia</i> DC., Harris 9651, Jamaica, K; <i>B. fuertesii</i> Urb., Ekman 13894, Greater Antilles, K; <i>B. oblongata</i> Britton, Ekman 18985, Cuba, K; <i>B. penaea</i> DC., Ekman 3982, Haiti (Hispaniola), K; <i>Phlebotania cowellii</i> Britton, Britton and Stewardson Brown 5703, Porto Rico, K;</p> <p><i>Ph. cuneata</i> Griseb., Ekman 9236, Cuba, K; <i>Polygala arillata</i> Buch-Ham. ex D. Don, Sino-British Expedition 1175, China, K; <i>P. chamaebuxus</i> Linn., Jackson 6343, France, RNG; <i>P. cruciata</i> L., Godfrey 48200, USA, K; <i>P. hebeclada</i> DC., Irwin <i>et al.</i> 13559, Brazil, K; <i>P. klotzschii</i> Chodat, Hatchbach and Silva 69279, Brazil, MEXU; <i>P. laurocola</i> St Hil., Harley 20506, Brazil, K; <i>P. ligustrioides</i> A. St-Hil. &amp; Moq., Irwin <i>et al.</i> 34335, Brazil, K; <i>P. macroptera</i> DC., M. Kerandren-Aymonin 25295, Madagascar, K; <i>P. meridionalis</i> Levyns &amp; Salter 1802, South Africa, K; <i>P. microphylla</i> L., Reynolds and Frazer H649/57, Portugal, K; <i>P. obscura</i> Benth., Tenorio <i>et al.</i> 11788, Mexico, MEXU; <i>P. senega</i> DC., Kennedy and Ganders 4111, Canada, K; <i>P. uncinata</i> C. Wright, Irwin <i>et al.</i> 19528, Brazil, K; <i>P. vulgaris</i> L., Martineol 45, Yugoslavia, K; <i>P. wattersii</i> Hance, Hwa 416, China, K</p> |                                                            |                                       |                                   |                                    |                                     |                              |                                | See Table 3 |

|                                                                                                                                                                                                                                                                                                                                                                                                                                                               |                       |   |   |   |   |                            |
|---------------------------------------------------------------------------------------------------------------------------------------------------------------------------------------------------------------------------------------------------------------------------------------------------------------------------------------------------------------------------------------------------------------------------------------------------------------|-----------------------|---|---|---|---|----------------------------|
| <i>Salomonina</i>                                                                                                                                                                                                                                                                                                                                                                                                                                             | 8 <sup>6</sup> ,11,12 | 2 | ✓ | ✓ | ✓ | 38,39                      |
| <p><i>Sa. ciliata</i> (L.) DC., Wallace 9187, Burma, K;<br/> <i>Sa. longiciliata</i> Kurz., Thomas 252, Brunei, K</p>                                                                                                                                                                                                                                                                                                                                         |                       |   |   |   |   |                            |
| <i>Securidaca</i>                                                                                                                                                                                                                                                                                                                                                                                                                                             | 80 <sup>4</sup> ,6,10 | 6 | ✓ | ✓ | ✓ | 40,41                      |
| <p><i>S. diversifolia</i> (L.) Blake, Hartley 24719, Brazil, K;<br/> <i>S. longipendunculata</i> Fresen., Mwasumbi <i>et al.</i> 16608,<br/> Tanzania, K; <i>S. paniculata</i> L.C. Rich, Tillet and Tillet 45669, British Guiana, K;<br/> <i>S. philippinensis</i> Chodat, Elmer 10851, Philippines, K;<br/> <i>S. virgata</i> Sw., Ekman 8322, Hispaniola, K; <i>S. velutischi</i> Oliv., Fernandez Casas 11574, Equatorial Guinea, K</p>                   |                       |   |   |   |   |                            |
| <i>Xanthophyllum</i>                                                                                                                                                                                                                                                                                                                                                                                                                                          | 93 <sup>5</sup> ,6    | 7 | ✓ | ✓ | ✓ | 5,13,31,34,<br>37,39,42,43 |
| <p><i>X. affine</i> Korth.ex Miq., Ngadiman 36794, Singapore, K; <i>X. ameonum</i> Chod., Aban Gibot SAN. 66701, Sabah, K;<br/> <i>X. fragrans</i> C.T.White, Hyland 8906, Australia, K;<br/> <i>X. lanceatum</i> (Miq.) J.J.Smith, Garrett 163, Thailand, K;<br/> <i>X. octandrum</i> (F.Muell.) Domin, Gray 1563, Australia, K; <i>X. papuanum</i> Meijden, Hartley 11385, Papua New Guinea, K; <i>X. vitellinum</i> D.Dietr., Bskar SAN. 28638, Sabah,</p> |                       |   |   |   |   |                            |

LM, light microscopy; SEM, scanning electron microscopy; TEM, transmission electron microscopy.

<sup>1</sup>Breteler & Smitsaert-Houwing (1977); <sup>2</sup>Persson (2001); <sup>3</sup>Morat & van der Meijden (1991); <sup>4</sup>Eriksen *et al.* (2000); <sup>5</sup>van der Meijden (1982); <sup>6</sup>van der Meijden (1988); <sup>7</sup>Gleason (1926); <sup>8</sup>van Royen & van Steenis (1952); <sup>9</sup>Wendt (2000); <sup>10</sup>Aymard & Berry (1997); <sup>11</sup>Goldblatt & Manning (2000); <sup>12</sup>Koyama (1995); <sup>13</sup>Eriksen (1993); <sup>14</sup>Forest (2004); <sup>15</sup>Bernardi (2000); <sup>16</sup>Marques (1980); <sup>17</sup>Pedley (1984); <sup>18</sup>Pendry (2001); <sup>19</sup>Paiva (1998); <sup>20</sup>Dumort (1823); <sup>21</sup>Fredoux (1977); <sup>22</sup>Gibbs & Ferguson (1987); <sup>23</sup>Labouriau (1973); <sup>24</sup>Labouriau & Morphy (1969); <sup>25</sup>De Leonardis *et al.* (1989); <sup>26</sup>Lobreau-Callen, Oltmann & Straka (1975); <sup>27</sup>Lobreau-Callen, Straka & Friedrich (1984); <sup>28</sup>Paiva & Santos Dias (1990); <sup>29</sup>Straka (1990); <sup>30</sup>Mohl (1835); <sup>31</sup>Erdtman (1952); <sup>32</sup>Sladkov (1967); <sup>33</sup>Hsieh, Hsieh & Lai (1995); <sup>34</sup>van der Ham (1988); <sup>35</sup>Arreguin-Sanchez *et al.* (1988); <sup>36</sup>Edgeworth (1877); <sup>37</sup>Simpson & Skvarla (1981); <sup>38</sup>Huang (1972); <sup>39</sup>Wang (1960); <sup>40</sup>Coetzee & Robbertse (1985); <sup>41</sup>Roubik & Moreno (1991); <sup>42</sup>Muller (1979); <sup>43</sup>Tissot, Chikhi & Nayar (1994).

describe the structure of Polygalaceae pollen using light microscopy (LM), scanning electron microscopy (SEM), and (selectively) transmission electron microscopy (TEM) in order to: (1) provide baseline data for studies on the ecology and evolution of pollen structure; (2) provide pollen data for phylogenetic analyses based on combined datasets; and (3) document the diversity of pollen structure in the family.

The pollen morphology of Polygalaceae has long been recognized as distinctive, and it has been used as a valuable diagnostic character at the family level (Chodat, 1896; Erdtman, 1952; van der Meijden, 1988). The pollen is polycolporate, often synorate (endocingulate), with between six and 30 ectoapertures (Erdtman, 1952; Eriksen, 1993; Furness & Stafford, 1995). However, until now, there has been no comprehensive, systematic survey of Polygalaceae pollen. In providing such a survey, this paper presents the first photomicrographs of the pollen of seven genera: *Balgoya*, *Barnhartia*, *Comesperma*, *Diclidanthera*, *Eriandra*, *Moutabea*, as well as *Polygala* subgenus *Badiera*, and species formerly included in *Nylandtia*, but now included in *Muraltia* (Forest & Manning, 2006). In addition, new information is presented for many species, such as *Polygala cruciata*, *P. meridionalis*, *P. uncinata*, *P. glochidiata*, *P. wattersii*, *P. hebeclada*, *P. macroptera*, and *P. obscura*. In this study, we sample the genus *Heterosamara* Kuntze, which was reinstated on the basis of flower morphology and pollen characters (Paiva, 1998). A summary of previous literature on the pollen of Polygalaceae is given in Tables 1 and 3.

## MATERIAL AND METHODS

### TAXON SAMPLING

The pollen of 73 species (Table 2), representing 18 genera, in Polygalaceae *sensu* Paiva (1998), Bernardi (2000), Eriksen, Staahl & Persson (2000), and Persson (2001) was examined using LM and SEM, and the pollen of eight species, representing seven genera, was examined using TEM. Taxon sampling was co-ordinated with that of the molecular studies by Forest (2004) and Forest *et al.* (2007) in order to facilitate future phylogenetic studies of combined datasets of the Fabales clade. All genera were sampled following the most recent authoritative taxonomic revisions available, and samples were chosen to be representative of geographical distributions, and biogeographical and morphological splits, within the genera. Sampling also sought to complement the pollen data already available from the literature (Tables 1 and 3; Table 1 lists the Polygalaceae genera recognized in this study, the total number of species per genus, and references to the taxonomic frame-

works that formed the basis of the sampling in each genus; Table 3 lists the literature for *Polygala*).

The three monotypic genera *Balgoya* P.Morat & Meijden (New Caledonia), *Barnhartia* Gleason (South America), and *Eriandra* P.Royen & Steenis (New Guinea) were all represented (Table 1). Both species of the West and Central African genus *Aroxima* Stapf were sampled to correspond with molecular studies. *Carpolobia* G.Don, also from Africa, is the sister taxon to *Aroxima*. It consists of four species, two of which were sampled to represent both savannah woodland (*C. goetzei*) and rain forest (*C. alba*). The Neotropical genus *Bredemeyera* Willd. has between 15 and 60 species depending on the taxonomic concepts followed (Marques, 1980; Eriksen *et al.*, 2000). Three species were sampled. Australian *Comesperma* Labill. includes 24 species, five of which were sampled, representing all three sections (Pedley, 1984). *Diclidanthera* Mart. is an Amazonian genus of four species, one of which was sampled. *Epirixanthes* Blume, with five to six species, has an Asian distribution (two species were sampled). Paiva (1998) recognized *Heterosamara* Kuntze as an African and Asian genus of 14 species, which is separated from *Polygala* mainly on the basis of pollen morphology. Four species were sampled to represent the geographical range.

Neotropical *Monnina* Ruiz & Pav. has about 150 species, and three species were sampled to reflect sections and geographical distribution. *Moutabea* Aubl. consists of eight to ten Central and South American species (Wendt, 2000), one of which was sampled. The mostly South African taxa *Muraltia* Neck. (117 species) and *Nylandtia* Dum. (two species) were sampled with seven and one species, respectively, to reflect the morphological and geographical ranges.

Sampling for *Polygala* L. follows the taxonomic frameworks of Paiva (1998). Paiva recognized about 500 species, divided into 12 subgenera, some of which were previously recognized as separate genera (i.e. the subgenera *Badiera* and *Phlebotaenia*). This study sampled 23 *Polygala s.l.* species representing ten of the 12 subgenera. The Asian *Salomonina* Lour. is a genus comprising six species, two of which were sampled to represent the geographical range. *Securidaca* L. is cosmopolitan (apart from Australia) and contains about 80 species, five of which were sampled to cover the geographical and morphological range. *Xanthophyllum* Roxb. has a geographical range from India across China and South-East Asia to Australia. The genus contains 93 species, seven of which were sampled to cover the seven sections recognized by van der Meijden (1982).

Pollen material was obtained from the herbaria of the Royal Botanic Gardens, Kew (K), the Mexican National Herbarium (MEXU), the Royal Botanic Garden, Sydney (NSW), and the Royal Botanic



**Table 2.** Polygalaceae pollen sampled, except for seven species which were not measured (*Aroxima afzeliana*, *Bredemeyera papuana*, *Muraltia alba*, *Muraltia serpylloides*, *Polygala* subgenus *Badiera panacea*, *Securidaca inappendiculata*, *Securidaca paniculata*)

| Taxon                                                                                                  | Average measurements<br>$P \times E$ ( $\mu\text{m}$ ) | $P/E$<br>( $\mu\text{m}$ ) | Polar wall<br>( $\mu\text{m}$ ) | Excoapertures<br>$l \times w$  | Endoapertures<br>$l \times w$              | Aperture<br>number |
|--------------------------------------------------------------------------------------------------------|--------------------------------------------------------|----------------------------|---------------------------------|--------------------------------|--------------------------------------------|--------------------|
| <i>Aroxima liberia</i> Stapf.                                                                          | (29)–38.0–(38) × (31)–36.3–(40)                        | 1.05                       | 2                               | (17)–19.8–(24) × (2)–2.2–(3)   | (3)–4–(6) × 5–8 or endocingulate           | 7–8                |
| <i>Balgoya pacifica</i> Morat & Meijden (six collections examined)                                     | (41)–45.9–(49) × (44)–45.3–(50)                        | 1.01                       | 1                               | (10)–21.4–(33) × (1)–2–(5)     | (1)–3.6–(11) × 3–6                         | 3                  |
| <i>Barnhartia floribunda</i> Gleason                                                                   | (29)–30.4–(32) × (44)–45.2–(50)                        | 0.67                       | 2                               | (18)–19.6–(22) × (0.5)–2.5–(4) | (3)–3.2–(5) × endocingulate                | 7–10               |
| <i>Bredemeyera lucida</i> (Benth.) Benn. (two collections examined)                                    | 23–24–(25) × (20)–21–(22)                              | 1.14                       | 1.5                             | (18)–18.7–(20) × (1)–1–(1)     | (2)–2.7–(3) × (4)–4.5–(5)                  | 10–11              |
| <i>Bredemeyera microphylla</i> Hieron.                                                                 | (26)–28.8–(32) × (20)–24–(29)                          | 1.20                       | 1.5–2                           | (19)–21.8–(23) × (1)–1.3–(2)   | (2)–3.2–(4) × 3 or endocingulate           | 10–12              |
| <i>Carpolobia alba</i> G.Don                                                                           | (36)–45.9–(44) × (38)–41.7–(45)                        | 1.10                       | 1.5–2                           | (24)–28.4–(32) × (2)–2.8–(3)   | (5)–7.7–(10) × endocingulate               | 12–15              |
| <i>Carpolobia goetzii</i> Gurke                                                                        | (34)–36.6–(40) × (34)–36.4–(40)                        | 1.00                       | 2–3                             | (21)–25.7–(30) × (1)–1.6–(3)   | (4)–5.7–(7) × (3)–5.3–(8) or endocingulate | 10–11              |
| <i>Comesperma calymega</i> Labill.                                                                     | (36)–39–(40) × (30)–35.5–(39)                          | 1.11                       | 2–3                             | (27)–30.8–(34) × (2)–2.2–(3)   | (4)–5.2–(6) × endocingulate                | 12–13              |
| <i>Comesperma ericinum</i> DC.                                                                         | (41)–42.5–(50) × (35)–41.7–(44)                        | 1.01                       | 2                               | (31)–38–(47) × (2)–3.4–(5)     | (7)–9.2–(11) × endocingulate               | 13–18              |
| <i>Comesperma hispidulum</i> Pedley                                                                    | (34)–41.4–(45) × (37)–44.7–(59)                        | 0.99                       | 2                               | (25)–30.8–(31) × (3)–3.4–(4)   | (9)–9.4–(10) × endocingulate               | 15–17              |
| <i>Comesperma virgatum</i> Labill.                                                                     | (46)–50.1–(54) × (45)–50.5–(55)                        | 0.93                       | 1.5–2                           | (36)–37.8–(40) × (4)–4.2–(5)   | (6)–7.8–(10) × endocingulate               | 14–17              |
| <i>Comesperma volubile</i> Labill.                                                                     | (51)–53.8–(58) × (41)–44.2–(47)                        | 1.22                       | 2                               | (37)–39–(42) × (2)–3–(4)       | (6)–7.4–(10) × endocingulate               | 13–15              |
| <i>Didclanthera penduliflora</i> Mart.                                                                 | (34)–38–(40) × (32)–36.1–(40)                          | 1.05                       | 2–3                             | (22)–24.7–(27) × (1)–1.7–(2)   | (2)–2.4–(3) × (4)–5.3–(7)                  | 8–9                |
| <i>Epirixanthes elongata</i> Bl.                                                                       | Not available                                          |                            |                                 |                                |                                            |                    |
| <i>Epirixanthes papuana</i> J.J.Sm.                                                                    | (39)–39.8–(48) × (33)–37.8–(43)                        | 1.05                       | 1.5                             | (10)–13.4–(16) × 2             | (1)–1.4–(3) × endocingulate                | 15–18              |
| <i>Eriandra fragrans</i> P.Royen & Steenis                                                             | (27)–26.2–(32) × (25)–26.6–(30)                        | 0.98                       | 2                               | (17)–18.4–(20) × (1)–1.2–(2)   | (4)–4.4–(5) × endocingulate                | 6–8                |
| <i>Heterosamara cabrae</i> (Chodat) J.A.R. Paiva                                                       | (35)–39.8–(47) × (65)–72.4–(81)                        | 0.55                       | 8 at top pole, 4 at bottom pole | (16)–20.6–(27) × (1)–1.4–(2)   | (1)–4–(6) × endocingulate                  | 33                 |
| <i>Heterosamara carrissoana</i> (Exell & Mendonça) J.A.R. Paiva                                        | (35)–37.5–(40) × (52)–60.5–(69)                        | 0.62                       | 3                               | 15 × 2                         | 2 × endocingulate                          |                    |
| <i>Heterosamara tatarinowii</i> (Regal) J.A.R. Paiva                                                   | 20 × 46                                                | 0.43                       | 2                               | (15)–15–(15) × (2)–2.5–(3)     | (2)–2.5–(3) × endocingulate                | 24                 |
| <i>Heterosamara ubonata</i> (Craib) J.A.R. Paiva                                                       | (9)–16–(20) × (30)–39.6–(43)                           | 0.40                       | 2                               | (11)–12.8–(14) × 2             | 2 × endocingulate                          | 30                 |
| <i>Monnina leptostachya</i> Benth.                                                                     | (29)–37.3–(41) × (29)–34.5–(38)                        | 1.08                       | 2–3.5                           | (19)–22.2–(26) × (1)–1.4–(1.5) | (1)–1.6–(3) × (3)–3.6–(4)                  | 13–15              |
| <i>Monnina richardiana</i> A.St.Hil.                                                                   | (40)–42.1–(49) × (37)–42.4–(45)                        | 0.98                       | 3                               | (31)–34.8–(40) × (2)–2.8–(3)   | (5)–5.6–(6) × endocingulate                | 13–15              |
| <i>Monnina xalapensis</i> HBK                                                                          | (37)–41.1–(48) × (39)–42.9–(50)                        | 0.95                       | 3                               | (26)–28.6–(31) × (1)–2.2–(3)   | (2)–2.4–(3) × 3–8 or endocingulate         | 12–16              |
| <i>Moutabea guianensis</i> Aubl.                                                                       | (25)–29.4–(36) × (24)–27.4–(32)                        | 1.07                       | 4                               | (20)–20.3–(21) × 1             | (1)–1.6–(2) × (1)–1.5–(2)                  | 11–13              |
| <i>Muraltia filiformis</i> (Thunb.) DC.                                                                | (42)–42.2–(51) × (40)–44.4–(48)                        | 0.95                       | 1–2                             | (38)–40.8–(44) × (6)–8–(9)     | (6)–6.7–(8) × 12 or endocingulate          | 8–9                |
| <i>Muraltia flanaganii</i> Bolus                                                                       | (23)–25–(28) × (21)–24.9–(28)                          | 1.00                       | 2                               | (14)–15.8–(18) × (1)–1.4–(3)   | (3)–3.4–(4) × 4 or endocingulate           | 14–16              |
| <i>Muraltia heisteria</i> (L.) DC.                                                                     | (46)–52.3–(59) × (40)–47.1–(52)                        | 1.11                       | 3                               | (31)–36.2–(42) × (8)–9.4–(11)  | (4)–4.8–(6) × 6–13 or endocingulate        | 8–9                |
| <i>Muraltia mixta</i> (L.f.) DC.                                                                       | 21–28.8–(32) × (31)–34.8–(38)                          | 0.83                       | 1                               | (16)–19–(22) × (4)–4.7–(6)     | 5 × endocingulate                          | 10–11              |
| <i>Muraltia thunbergii</i> E. and Z.                                                                   | 36 × 33                                                | 1.09                       | 2–3                             | 24 × 3                         | 4 × endocingulate                          | 9                  |
| <i>Nylandtia spinosa</i> (L.) Dumort.                                                                  | 28–34.6–(38) × (26)–33.3–(35)                          | 1.04                       | 2                               | (24)–24.8–(26) × (3)–3.6–(4)   | 5 × 5 or endocingulate                     | 12–14              |
| <b>Polygala L.</b>                                                                                     | (32)–34.8–(40) × (26)–27.9–(29)                        | 1.25                       | 2                               | (24)–26.4–(31) × 1             | (1)–2.6–(4) × 4 or endocingulate           | 10–12              |
| <b>Subgenus I <i>Phlebotanien</i> (Griseb.) S.F. Blake (= genus <i>Phlebotanien sensu Griseb.</i>)</b> |                                                        |                            |                                 |                                |                                            |                    |
| <i>Phlebotanien covellii</i> Britton                                                                   | (32)–34.8–(40) × (26)–27.9–(29)                        | 1.25                       | 2                               | (24)–26.4–(31) × 1             | (1)–2.6–(4) × 4 or endocingulate           | 10–12              |
| <i>Phlebotanien cuneata</i> Griseb.                                                                    | (26)–28.4–(31) × (21)–26.3–(30)                        | 1.08                       | 2                               | (17)–20.8–(23) × 1             | (3)–3.6–(4) × (6)–6.6–(7)                  | 10                 |
| <b>Subgenus II <i>Badiera</i> (DC.) S.F. Blake (= genus <i>Badiera sensu DC.</i>)</b>                  |                                                        |                            |                                 |                                |                                            |                    |
| <i>Badiera acuminata</i> DC.                                                                           | (33)–36.5–(39) × (32)–35.3–(38)                        | 1.03                       | 2–3                             | (26)–29.2–(31) × (3)–4.2–(5)   | (4)–7.4–(11) × 5–6 or endocingulate        | 12–13              |
| <i>Badiera caracasana</i> (Kunth) C. Persson                                                           | (37)–42.2–(49) × (31)–32.9–(37)                        | 1.28                       | 2                               | (28)–30.6–(33) × (1)–1.2–(2)   | (4)–4.2–(5) × 4 or endocingulate           | 17–18              |
| <i>Badiera diversifolia</i> DC.                                                                        | (23)–25.9–(29) × (24)–25.9–(28)                        | 1.00                       | 1.5–2                           | (20)–21–(22) × (2)–2.8–(3)     | 4 × 5–8 or endocingulate                   | 8–10               |
| <i>Badiera fuertesii</i> Urb.                                                                          | (25)–27–(29) × (24)–26.4–(29)                          | 1.02                       | 1                               | (15)–17.8–(20) × (1)–1.4–(2)   | (2)–2.4–(3) × (3)–4.2–(6)                  | 8–10               |
| <i>Badiera oblongata</i> Britton                                                                       | (20)–21.8–(23) × (20)–22.7–(24)                        | 0.96                       | 2                               | (10)–13.6–(15) × (1)–1.5–(2)   | (1)–1.9–(3) × (3)–3.4–(4)                  | 8–10               |
| <i>Badiera penaea</i> DC.                                                                              | (22)–23.5–(25) × (16)–18–(21)                          | 1.30                       | 1                               | (14)–16–(19) × (1)–1–(1)       | (2)–2.2–(3) × (3)–3.6–(4)                  | 8–9                |

Table 2. Continued

| Taxon                                                                                                                                                   | Average measurements<br>$P \times E$ ( $\mu\text{m}$ ) | $P/E$ | Polar wall<br>( $\mu\text{m}$ ) | Ectoapertures<br>$l \times w$         | Endoapertures<br>$l \times w$             | Aperture<br>number |
|---------------------------------------------------------------------------------------------------------------------------------------------------------|--------------------------------------------------------|-------|---------------------------------|---------------------------------------|-------------------------------------------|--------------------|
| <b>Subgenus III <i>Hebecarpa</i> (Chodat) S.F. Blake (= sect. <i>Hebecarpa</i> Chodat)</b>                                                              |                                                        |       |                                 |                                       |                                           |                    |
| <i>Polygala obscura</i> Benth.                                                                                                                          | (36)–38.2–(41) $\times$ (27)–33.7–(35)                 | 1.13  | 1.5                             | (26)–26.8–(28) $\times$ (1)–1.2–(2)   | (4)–4.8–(5) $\times$ endocingulate        | 18–22              |
| <b>Subgenus IV <i>Acanthocladius</i> (Klotzsch ex Hassk.) Paiva (= genus <i>Acanthocladius</i> Klotzsch ex Hassk.)</b>                                  |                                                        |       |                                 |                                       |                                           |                    |
| <i>Polygala klotzschii</i> Chodat                                                                                                                       | (24)–26–(27) $\times$ (23)–25.5–(28)                   | 1.02  | 2                               | (18)–19.2–(20) $\times$ (2)–2.2–(3)   | (4)–4.2–(5) $\times$ (4)–5.2–(6)          | 8–10               |
| <b>Subgenus V <i>Ligustrina</i> (Chodat) Paiva (= sect. <i>Ligustrina</i> Chodat)</b>                                                                   |                                                        |       |                                 |                                       |                                           |                    |
| <i>Polygala laureola</i> St Hil.                                                                                                                        | (74)–81.1–(87) $\times$ (46)–52.9–(56)                 | 1.53  | 3                               | (28)–24.6–(27) $\times$ (6)–9.4–(10)  | (7)–10–(12) $\times$ endocingulate        | 9                  |
| <i>Polygala ligustrinoides</i> A.St.Hil. & Moq.                                                                                                         | (76)–83.6–(93) $\times$ (46)–56.3–(61)                 | 1.48  | 3–3.5                           | (13)–13.8–(15) $\times$ (8)–9.6–(10)  | (6)–6.8–(7) $\times$ endocingulate        | 8–9                |
| <b>Subgenus VI <i>Brachytropis</i> (DC.) Chodat (= sect. <i>Brachytropis</i> DC.)</b>                                                                   |                                                        |       |                                 |                                       |                                           |                    |
| <i>Polygala micropophylla</i> L.                                                                                                                        | (36)–38.3–(39) $\times$ (33)–37–(40)                   | 1.04  | 2.5–3                           | (25)–29–(32) $\times$ (4)–4.8–(6)     | (5)–5.6–(6) $\times$ endocingulate        | 11–14              |
| <b>Subgenus VII <i>Gymnospora</i> (Chodat) Paiva (= sect. <i>Gymnospora</i> Chodat)</b>                                                                 |                                                        |       |                                 |                                       |                                           |                    |
| <b>Subgenus VIII <i>Hebeclada</i> (Chodat) S.F. Blake (= sect. <i>Hebeclada</i> Chodat)</b>                                                             |                                                        |       |                                 |                                       |                                           |                    |
| <i>Polygala hebeclada</i> DC.                                                                                                                           | (32)–36.1–(42) $\times$ (32)–39.9–(44)                 | 0.90  | 1–2                             | (29)–31.8–(34) $\times$ (3)–4.4–(5)   | (5)–6–(7) $\times$ endocingulate          | 11–13              |
| <i>Polygala senega</i> DC.                                                                                                                              | (31)–32.8–(39) $\times$ (22)–31–(37)                   | 1.06  | 1–2                             | (30)–31.4–(33) $\times$ (7)–8.4–(11)  | 2 $\times$ (8)–9.6–(12)                   | 8–9                |
| <b>Subgenus IX <i>Rhinotropis</i> (S.F. Blake) Paiva (= subgenus <i>Chamaebuxus</i> (DC.) Duch. sect. <i>Rhinotropis</i> S.F. Blake)</b>                |                                                        |       |                                 |                                       |                                           |                    |
| <b>Subgenus X <i>Chodatia</i> (= subgenus <i>Chamaebuxus</i> sect. <i>Artillus sensu</i> Chen)</b>                                                      |                                                        |       |                                 |                                       |                                           |                    |
| <i>Polygala arillata</i> Buch-Ham.ex D.Don                                                                                                              | (46)–51.4–(56) $\times$ (39)–43.6–(48)                 | 1.18  | 1.5–2                           | (28)–30.4–(34) $\times$ (3)–3.4–(5)   | (4)–6.2–(8) $\times$ endocingulate        | 17–18              |
| <b>Subgenus X <i>Chodatia</i> (= subgenus <i>Pseudosemeiocardium</i> (Adema) J. Chrtrek &amp; B. Kisa sect. <i>Villosperma sensu</i> Wu &amp; Chen)</b> |                                                        |       |                                 |                                       |                                           |                    |
| <i>Polygala wattersii</i> Hance                                                                                                                         | (30)–36.4–(42) $\times$ (53)–61.2–(65)                 | 0.59  | 5                               | (25)–25.2–(26) $\times$ (5)–5.2–(6)   | (7)–8.7–(10) $\times$ endocingulate       | 17–21              |
| <b>Subgenus XI <i>Chamaebuxus</i> (DC.) Duch.</b>                                                                                                       |                                                        |       |                                 |                                       |                                           |                    |
| <i>Polygala chamaebuxus</i> Linn.                                                                                                                       | ((50)–55.4–(62) $\times$ (48)–53.8–(60)                | 1.03  | 1–2                             | (37)–42.4–(45) $\times$ (5)–5.8–(6)   | (5)–8–(10) $\times$ endocingulate         | 16–18              |
| <b>Subgenus XII <i>Polygala</i> Duch.</b>                                                                                                               |                                                        |       |                                 |                                       |                                           |                    |
| <i>Polygala cruciata</i> L.                                                                                                                             | (34)–35.5–(37) $\times$ (32)–33.5–(35)                 | 1.06  | 2–3                             | (22)–22.7–(23) $\times$ 1             | (2)–2.7–(3) $\times$ endocingulate        | 10–12              |
| <i>Polygala macroptera</i> DC.                                                                                                                          | (49)–52–(57) $\times$ (45)–51.3–(56)                   | 1.01  | 2–3                             | (33)–35.6–(40) $\times$ (3)–4.4–(6)   | (12)–12.6–(14) $\times$ (8)–9.2–(11)      | 12–15              |
| <i>Polygala meridionalis</i> Levyns                                                                                                                     | (34)–40.6–(43) $\times$ (36)–39.7–(43)                 | 1.02  | 2–3                             | (28)–31.6–(34) $\times$ (1.5)–3.1–(4) | (6)–10.4–(12) $\times$ endocingulate      | 20–21              |
| <i>Polygala uncinata</i> C.Wright                                                                                                                       | (23)–32.1–(36) $\times$ (20)–29.1–(34)                 | 1.10  | 1.5–2                           | (22)–24.2–(27) $\times$ (1)–3.4–(5)   | (1)–2.8–(4) $\times$ 5–7 or endocingulate | 10–11              |
| <i>Polygala vulgaris</i> L.                                                                                                                             | (28)–31.8–(35) $\times$ (25)–34.4–(40)                 | 0.92  | 2                               | (19)–23–(26) $\times$ 5               | 4 $\times$ endocingulate                  | 9–12               |
| <i>Salomonina ciliata</i> (L.) DC.                                                                                                                      | (34)–41.7–(46) $\times$ (35)–40.5–(43)                 | 1.03  | 2                               | 22 $\times$ 3                         | 2 $\times$ endocingulate                  | 13–14              |
| <i>Salomonina longiciliata</i> Kurz.                                                                                                                    | (31)–38.7–(44) $\times$ (37)–41–(45)                   | 0.94  | 1                               | (22)–23.4–(26) $\times$ (3)–4–(5)     | (7)–9–(10) $\times$ endocingulate         | 14–16              |
| <i>Securidaca diversifolia</i> (L.) Blake                                                                                                               | (35)–39.4–(42) $\times$ (35)–39.3–(42)                 | 1.00  | 1.5                             | (31)–34.4–(39) $\times$ (3)–4.4–(5)   | (6)–6.4–(8) $\times$ (5)–6–(7)            | 11–13              |
| <i>Securidaca longipendunculata</i> Fresen.                                                                                                             | (32)–32.9–(35) $\times$ (32)–33.8–(35)                 | 0.97  | 4–5                             | (23)–25.4–(27) $\times$ (2)–2.2–(3)   | (2)–2.6–(4) $\times$ (5)–7.4–(8)          | 9–10               |
| <i>Securidaca philippinensis</i> Chodat                                                                                                                 | (30)–33–(35) $\times$ (31)–34.8–(37)                   | 0.95  | 2                               | (22)–25.3–(27) $\times$ 2             | 3 $\times$ (4)–4.6–(5)                    | 8–9                |
| <i>Securidaca virgata</i> Sw.                                                                                                                           | (36)–39.2–(43) $\times$ (32)–38.7–(44)                 | 1.01  | 4                               | (28)–29.4–(31) $\times$ (3)–3.6–(4)   | (3)–3.6–(4) $\times$ (5)–5.2–(6)          | 9–10               |
| <i>Securidaca welwitschii</i> Oliv.                                                                                                                     | (29)–30.3–(32) $\times$ (32)–34–(36)                   | 0.89  | 2.5                             | 26 $\times$ 2                         | (1)–1.5–(2) $\times$ (4)–4.5–(5)          | 9–11               |
| <i>Xanthophyllum affine</i> Korth.ex Mirq.                                                                                                              | (28)–31.3–(35) $\times$ (30)–32.7–(35)                 | 0.96  | 1–2                             | (18)–19.2–(20) $\times$ (1)–1.5–(2)   | (4)–5–(6) $\times$ endocingulate          | 9–10               |
| <i>Xanthophyllum ameonum</i> Chod.                                                                                                                      | (26)–25–(30) $\times$ (26)–24.7–(29)                   | 1.01  | 2                               | (18)–20.2–(23) $\times$ (1)–1.2–(2)   | 3 $\times$ endocingulate                  | 7–9                |
| <i>Xanthophyllum fragrans</i> C.T.White                                                                                                                 | (41)–48.3–(52) $\times$ (41)–45.1–(49)                 | 1.07  | 2                               | (24)–33.6–(40) $\times$ (2)–2.6–(3)   | (8)–9–(11) $\times$ endocingulate         | 10–11              |
| <i>Xanthophyllum lanceatum</i> (Mirq.) J.J.Smith                                                                                                        | 27–27.9–(29) $\times$ (23)–27–(30)                     | 1.03  | 2                               | (17)–20–(22) $\times$ (1)–1.5–(2)     | (3)–3.2–(4) $\times$ endocingulate        | 8–9                |
| <i>Xanthophyllum octandrum</i> (F.Muell.) Domin                                                                                                         | 29–29.8–(31) $\times$ (28)–29.3–(31)                   | 1.02  | 1.5–2                           | (19)–22–(24) $\times$ (2)–3–(4)       | (5)–8–(10) $\times$ endocingulate         | 8–9                |
| <i>Xanthophyllum papuanum</i> Meijden                                                                                                                   | (20)–22.9–(24) $\times$ (19)–20.9–(22)                 | 1.10  | 1.5–2                           | (13)–16–(17) $\times$ 1               | (4)–4.6–(6) $\times$ endocingulate        | 5–6                |
| <i>Xanthophyllum vitellinum</i> D.Dietr.                                                                                                                | (30)–37.5–(45) $\times$ (29)–30.6–(32)                 | 1.23  | 2                               | (25)–27.9–(31) $\times$ (1)–1.6–(2)   | (4)–8.6–(11) $\times$ endocingulate       | 9–10               |



**Table 3.** Summary of *Polygala* pollen literature

| Species               | Description | Drawing | LM | SEM | TEM | References                                                                                                                                                           |
|-----------------------|-------------|---------|----|-----|-----|----------------------------------------------------------------------------------------------------------------------------------------------------------------------|
| <i>abyssinica</i>     | ✓           |         | ✓  |     |     | Erdtman (1952); Nair (1965); Sladkov (1967); Gupta & Sharma (1986); Kantha & Prasad (1989); Paiva (1998)                                                             |
| <i>africana</i>       | ✓           |         | ✓  | ✓   |     | Paiva (1998)                                                                                                                                                         |
| <i>alba</i>           | ✓           |         | ✓  | ✓   | ✓   | Larson & Skvarla (1961); Arreguin-Sanchez <i>et al.</i> (1988); Jones <i>et al.</i> (1995); Paiva (1998)                                                             |
| <i>albicans</i>       | ✓           |         | ✓  |     |     | Paiva (1998)                                                                                                                                                         |
| <i>alpestris</i>      | ✓           |         | ✓  | ✓   |     | Furness & Stafford (1995); Paiva (1998)                                                                                                                              |
| <i>alpina</i>         | ✓           |         | ✓  | ✓   |     | Villnueva & Ramos (1986); Furness & Stafford (1995); Paiva (1998)                                                                                                    |
| <i>amara</i>          | ✓           |         | ✓  | ✓   |     | Furness & Stafford (1995); Paiva (1998)                                                                                                                              |
| <i>amarella</i>       | ✓           |         | ✓  | ✓   |     | Furness & Stafford (1995); Paiva (1998)                                                                                                                              |
| <i>ambigua</i>        | ✓           |         | ✓  | ✓   |     | Ikuse (1956); Paiva (1998)                                                                                                                                           |
| <i>angustifolia</i>   | ✓           |         | ✓  | ✓   |     | Paiva (1998)                                                                                                                                                         |
| <i>apopetala</i>      | ✓           |         | ✓  | ✓   |     | Paiva (1998)                                                                                                                                                         |
| <i>appressipilis</i>  | ✓           |         | ✓  | ✓   |     | Arreguin-Sanchez <i>et al.</i> (1988); Paiva (1998)                                                                                                                  |
| <i>arcuata</i>        | ✓           |         | ✓  | ✓   |     | Huang (1972)                                                                                                                                                         |
| <i>arillata</i>       | ✓           | ✓       | ✓  | ✓   |     | Wang (1960); Sumithraarachchi (1982); Kantha & Prasad (1989); Chen (1991)                                                                                            |
| <i>arizonae</i>       | ✓           |         | ✓  | ✓   |     | Paiva (1998)                                                                                                                                                         |
| <i>atacorensis</i>    | ✓           |         | ✓  |     |     | Paiva (1998)                                                                                                                                                         |
| <i>baetica</i>        | ✓           |         | ✓  |     |     | Villnueva & Ramos (1986); Ubersa & Diez (1994); Paiva (1998)                                                                                                         |
| <i>baikiei</i>        | ✓           |         | ✓  |     |     | Paiva (1998)                                                                                                                                                         |
| <i>balansae</i>       | ✓           |         | ✓  |     |     | Reille (1995); Paiva (1998)                                                                                                                                          |
| <i>barbeyana</i>      | ✓           |         | ✓  |     |     | Paiva (1998)                                                                                                                                                         |
| <i>baissieri</i>      | ✓           |         | ✓  |     |     | Villnueva & Ramos (1986); Paiva (1998)                                                                                                                               |
| <i>brachystachya</i>  | ✓           |         | ✓  |     |     | Kantha & Prasad (1989); Paiva (1998)                                                                                                                                 |
| <i>bracteata</i>      | ✓           |         | ✓  |     |     | Edgeworth (1877)                                                                                                                                                     |
| <i>bulbothrix</i>     | ✓           | ✓       | ✓  |     |     | Kantha & Prasad (1989)                                                                                                                                               |
| <i>butytacea</i>      | ✓           |         | ✓  |     |     | Paiva (1998)                                                                                                                                                         |
| <i>calcareo</i>       | ✓           |         | ✓  | ✓   |     | Villnueva & Ramos (1986); Furness & Stafford (1995); Paiva (1998)                                                                                                    |
| <i>capillaris</i>     | ✓           |         | ✓  |     |     | Paiva (1998)                                                                                                                                                         |
| <i>chamaebuxus</i>    | ✓           | ✓       | ✓  | ✓   |     | Mohl (1835); Chodat (1896); Furness & Stafford (1995); Reille (1995); Paiva (1998)                                                                                   |
| <i>chinensis</i>      | ✓           |         | ✓  | ✓   |     | Nair (1965); Sumithraarachchi (1982); Gupta & Sharma (1986); Kantha & Prasad (1989); Paiva (1998)                                                                    |
| <i>comosa</i>         | ✓           |         | ✓  | ✓   |     | Furness & Stafford (1995); Paiva (1998)                                                                                                                              |
| <i>compacta</i>       | ✓           |         | ✓  | ✓   |     | Arreguin-Sanchez <i>et al.</i> (1988); Paiva (1998)                                                                                                                  |
| <i>cordata</i>        | ✓           |         | ✓  |     |     | Erdtman (1952)                                                                                                                                                       |
| <i>costaricensis</i>  | ✓           |         | ✓  |     |     | Paiva (1998)                                                                                                                                                         |
| <i>crisitata</i>      | ✓           |         | ✓  |     |     | Paiva (1998)                                                                                                                                                         |
| <i>crotonarioides</i> | ✓           |         | ✓  |     |     | Nair (1965)                                                                                                                                                          |
| <i>crotonarioides</i> | ✓           |         | ✓  |     |     | Gupta & Sharma (1986)                                                                                                                                                |
| <i>cymosa</i>         | ✓           |         | ✓  | ✓   |     | Jones <i>et al.</i> (1995)                                                                                                                                           |
| <i>desertorum</i>     | ✓           |         | ✓  |     |     | Paiva (1998)                                                                                                                                                         |
| <i>elongata</i>       | ✓           |         | ✓  |     |     | Kantha & Prasad (1989); Paiva (1998)                                                                                                                                 |
| <i>ericaeifolia</i>   | ✓           |         | ✓  |     |     | Paiva (1998)                                                                                                                                                         |
| <i>erioptera</i>      | ✓           |         | ✓  |     |     | Van Campo (1958); Jain & Nanda (1966); Bonnefille & Riollet (1980); De Leonardis <i>et al.</i> (1989); El Ghazali (1989); Perveen, Ali & Qaiser (1994); Paiva (1998) |
| <i>fallax</i>         | ✓           | ✓       |    |     |     | Chen (1991)                                                                                                                                                          |
| <i>flavescens</i>     | ✓           |         | ✓  |     |     | De Leonardis <i>et al.</i> (1989)                                                                                                                                    |
| <i>floribunda</i>     | ✓           | ✓       | ✓  | ✓   |     | Paiva (1998)                                                                                                                                                         |
| <i>fruticosa</i>      | ✓           | ✓       | ✓  | ✓   | ✓   | Graham (1963); Paiva & Santos Dias (1990); Paiva (1998)                                                                                                              |

Table 3. *Continued*

| Species               | Description | Drawing | LM | SEM | TEM | References                                                                                                     |
|-----------------------|-------------|---------|----|-----|-----|----------------------------------------------------------------------------------------------------------------|
| <i>furcata</i>        | ✓           |         |    |     |     | Kantha & Prasad (1989)                                                                                         |
| <i>garcinii</i>       | ✓           |         |    | ✓   |     | Paiva (1998)                                                                                                   |
| <i>gayi</i>           | ✓           |         |    |     |     | Paiva (1998)                                                                                                   |
| <i>gazensis</i>       | ✓           |         |    |     |     | Paiva (1998)                                                                                                   |
| <i>glaucooides</i>    | ✓           |         |    | ✓   |     | Sumithraarachchi (1982)                                                                                        |
| <i>globulifera</i>    | ✓           | ✓       |    |     |     | Chen (1991)                                                                                                    |
| <i>glomerata</i>      | ✓           |         | ✓  | ✓   |     | Sumithraarachchi (1982); Chauhan & Bera (1990)                                                                 |
| <i>grandiflora</i>    | ✓           | ✓       |    |     |     | Edgeworth (1877); Nauman (1981); Paiva (1998)                                                                  |
| <i>guineensis</i>     | ✓           |         |    |     |     | Paiva (1998)                                                                                                   |
| <i>hebantha</i>       | ✓           |         |    |     |     | Paiva (1998)                                                                                                   |
| <i>hebeclada</i>      | ✓           |         |    |     |     | Paiva (1998)                                                                                                   |
| <i>hirsutula</i>      | ✓           |         |    | ✓   |     | Sumithraarachchi (1982)                                                                                        |
| <i>hispidula</i>      | ✓           |         |    |     |     | Paiva (1998)                                                                                                   |
| <i>hongkongensis</i>  | ✓           |         |    |     |     | Wang (1960)                                                                                                    |
| <i>incarnata</i>      | ✓           |         |    | ✓   | ✓   | Larsen & Skvarla (1961); Jones <i>et al.</i> (1995); Paiva (1998)                                              |
| <i>irregularis</i>    | ✓           |         |    | ✓   |     | El Ghazali (1989); Perveen <i>et al.</i> (1994)                                                                |
| <i>irregularis</i>    | ✓           |         |    |     |     | Paiva (1998)                                                                                                   |
| <i>jamaicensis</i>    | ✓           |         |    |     |     | Paiva (1998)                                                                                                   |
| <i>japonica</i>       | ✓           |         | ✓  |     |     | Ikuse (1956); Wang (1960); Huang (1972); Nakamura (1980); Paiva (1998)                                         |
| <i>javana</i>         | ✓           | ✓       |    | ✓   |     | Arachi (1968); Sumithraarachchi (1982); Kantha & Prasad (1989); Paiva (1998)                                   |
| <i>klotzschii</i>     | ✓           |         |    | ✓   |     | Paiva (1998)                                                                                                   |
| <i>latifolia</i>      | ✓           |         |    |     |     | Erdtman (1952); Sladkov (1967)                                                                                 |
| <i>laureola</i>       | ✓           |         |    | ✓   |     | Paiva (1998)                                                                                                   |
| <i>leptalea</i>       | ✓           |         |    | ✓   |     | Sumithraarachchi (1982)                                                                                        |
| <i>ligustrioides</i>  | ✓           |         | ✓  | ✓   |     | Braga (1961); Paiva (1998)                                                                                     |
| <i>limiflora</i>      | ✓           |         |    |     |     | El Ghazali (1989)                                                                                              |
| <i>lutea</i>          | ✓           |         |    | ✓   |     | Jones <i>et al.</i> (1995)                                                                                     |
| <i>macradenia</i>     | ✓           |         |    | ✓   |     | Paiva (1998)                                                                                                   |
| <i>macrolophos</i>    | ✓           |         |    | ✓   |     | Sumithraarachchi (1982)                                                                                        |
| <i>macroptera</i>     | ✓           |         |    |     |     | Paiva (1998)                                                                                                   |
| <i>major</i>          | ✓           |         | ✓  |     |     | Reille (1995)                                                                                                  |
| <i>mellilotioides</i> | ✓           |         | ✓  | ✓   |     | Paiva (1998)                                                                                                   |
| <i>mexicana</i>       | ✓           |         | ✓  | ✓   |     | Arreguin-Sanchez <i>et al.</i> (1988)                                                                          |
| <i>mexicana</i>       | ✓           |         | ✓  | ✓   |     | Paiva (1998)                                                                                                   |
| <i>microphylla</i>    | ✓           |         | ✓  | ✓   |     | Villnueva & Ramos (1986); Uberta & Diez (1994); Paiva (1998)                                                   |
| <i>minuta</i>         | ✓           |         | ✓  | ✓   |     | Paiva (1998)                                                                                                   |
| <i>monspeliaca</i>    | ✓           |         | ✓  | ✓   |     | Villnueva & Ramos (1986); De Leonardis <i>et al.</i> (1989); Uberta & Diez (1994); Reille (1995); Paiva (1998) |
| <i>mosii</i>          | ✓           |         |    |     |     | Paiva (1998)                                                                                                   |
| <i>munbyana</i>       | ✓           |         |    |     |     | Paiva (1998)                                                                                                   |
| <i>myrtifolia</i>     | ✓           | ✓       |    | ✓   |     | Mohl (1835); Erdtman (1952); Paiva (1998)                                                                      |
| <i>myrtilloides</i>   | ✓           |         |    | ✓   |     | Arreguin-Sanchez <i>et al.</i> (1988)                                                                          |
| <i>nana</i>           | ✓           |         | ✓  | ✓   |     | Jones <i>et al.</i> (1995)                                                                                     |
| <i>nicaeensis</i>     | ✓           |         | ✓  | ✓   |     | Villnueva & Ramos (1986) (ssp.); Furness & Stafford (1995); Paiva (1998)                                       |
| <i>obcordata</i>      | ✓           |         |    |     |     | Erdtman (1952)                                                                                                 |
| <i>oblongata</i>      | ✓           |         |    |     |     | Paiva (1998)                                                                                                   |
| <i>obscura</i>        | ✓           |         |    |     |     | Paiva (1998)                                                                                                   |

|                         |   |   |                                                                                                                                                                                                                                                                 |
|-------------------------|---|---|-----------------------------------------------------------------------------------------------------------------------------------------------------------------------------------------------------------------------------------------------------------------|
| <i>paniculata</i>       | ✓ | ✓ | Huang (1972); Palacios-Chávez, Arreguin-Sánchez & Quiroz-García (1990); Roubik & Moreno (1991); Paiva (1998)                                                                                                                                                    |
| <i>parryi</i>           | ✓ |   | Paiva (1998)                                                                                                                                                                                                                                                    |
| <i>perrieri</i>         | ✓ | ✓ | Paiva (1998)                                                                                                                                                                                                                                                    |
| <i>persicariaefolia</i> | ✓ | ✓ | Kantha & Prasad (1989)                                                                                                                                                                                                                                          |
| <i>persicariifolia</i>  | ✓ | ✓ | El Ghazali (1989); Paiva (1998)                                                                                                                                                                                                                                 |
| <i>pilosa</i>           | ✓ | ✓ | Lobreau-Callen <i>et al.</i> (1975); Straka (1975)                                                                                                                                                                                                              |
| <i>preslii</i>          | ✓ | ✓ | De Leonardis <i>et al.</i> (1989); Paiva (1998)                                                                                                                                                                                                                 |
| <i>ramosa</i>           | ✓ | ✓ | Jones <i>et al.</i> (1995)                                                                                                                                                                                                                                      |
| <i>reinii</i>           | ✓ | ✓ | Ikuse (1956)                                                                                                                                                                                                                                                    |
| <i>rosmarinifolia</i>   | ✓ | ✓ | Sumithraarachchi (1982); Kantha & Prasad (1989); Paiva (1998)                                                                                                                                                                                                   |
| <i>rupestris</i>        | ✓ | ✓ | Villnueva & Ramos (1986); Ubers & Diez (1994); Paiva (1998)                                                                                                                                                                                                     |
| <i>senega</i>           | ✓ | ✓ | Ikuse (1956) (var. <i>latifolia</i> ); Paiva (1998)                                                                                                                                                                                                             |
| <i>sepyllacea</i>       | ✓ | ✓ | Erdtman (1943)                                                                                                                                                                                                                                                  |
| <i>serpens</i>          | ✓ | ✓ | Paiva (1998)                                                                                                                                                                                                                                                    |
| <i>serpyllifolia</i>    | ✓ | ✓ | Erdtman (1969); Blackmore & Barnes (1986); Furness & Stafford (1995); Reille (1995); Paiva (1998)                                                                                                                                                               |
| <i>shimadae</i>         | ✓ | ✓ | Huang (1972)                                                                                                                                                                                                                                                    |
| <i>sibirica</i>         | ✓ | ✓ | Kantha & Prasad (1989)                                                                                                                                                                                                                                          |
| <i>stiptata</i>         | ✓ | ✓ | Paiva (1998)                                                                                                                                                                                                                                                    |
| <i>subalata</i>         | ✓ | ✓ | Arreguin-Sanchez <i>et al.</i> (1988)                                                                                                                                                                                                                           |
| <i>sunalata</i>         | ✓ | ✓ | Paiva (1998)                                                                                                                                                                                                                                                    |
| <i>tatarinowii</i>      | ✓ | ✓ | Nakamura (1980)                                                                                                                                                                                                                                                 |
| <i>telephoides</i>      | ✓ | ✓ | Sumithraarachchi (1982); Kantha & Prasad (1989)                                                                                                                                                                                                                 |
| <i>timouthoides</i>     | ✓ | ✓ | Braga (1961); Paiva (1998)                                                                                                                                                                                                                                      |
| <i>tricornis</i>        | ✓ | ✓ | Wang (1960)                                                                                                                                                                                                                                                     |
| <i>triflora</i>         | ✓ | ✓ | Sumithraarachchi (1982)                                                                                                                                                                                                                                         |
| <i>triphylla</i>        | ✓ | ✓ | Huang (1972)                                                                                                                                                                                                                                                    |
| <i>vayreadae</i>        | ✓ | ✓ | Villnueva & Ramos (1986); Paiva (1998)                                                                                                                                                                                                                          |
| <i>violoides</i>        | ✓ | ✓ | Paiva (1998)                                                                                                                                                                                                                                                    |
| <i>virgata</i>          | ✓ | ✓ | Paiva (1998)                                                                                                                                                                                                                                                    |
| <i>viscoides</i>        | ✓ | ✓ | Paiva (1998)                                                                                                                                                                                                                                                    |
| <i>vulgaris</i>         | ✓ | ✓ | Aldridge (1842); Edgeworth (1877); Pereira (1942, 1943); Erdtman (1952, 1969); Dimbleby (1967); Moore & Webb (1978); Simpson & Skvarla (1981); Villnueva & Ramos (1986); Moore, Webb & Collinson (1991); Furness & Stafford (1995); Reille (1995); Paiva (1998) |
| <i>wattersii</i>        | ✓ | ✓ | Chen (1991)                                                                                                                                                                                                                                                     |
| <i>webbiana</i>         | ✓ | ✓ | Paiva (1998)                                                                                                                                                                                                                                                    |
| <i>welwitschii</i>      | ✓ | ✓ | Paiva (1998)                                                                                                                                                                                                                                                    |
| <i>wightiana</i>        | ✓ | ✓ | Kantha & Prasad (1989)                                                                                                                                                                                                                                          |
| <i>youngii</i>          | ✓ | ✓ | Paiva (1998)                                                                                                                                                                                                                                                    |

LM, light microscopy; SEM, scanning electron microscopy; TEM, transmission electron microscopy.

Garden, Edinburgh (E). All taxa and specimens studied are listed in Table 2.

#### METHODS

Mature, unopened buds from herbarium specimens were dissected in a 1% solution of Libsorb. Pollen was acetolysed according to Erdtman (1960) and prepared for LM by mounting in glycerol jelly. Measurements were recorded using a Nikon Labophot LM. At least ten grains of each sample were measured for polar length (*P*), equatorial width (*E*), exine thickness at the pole, and aperture dimensions (Table 2). For SEM, acetolysed pollen exines in 95% ethanol were pipetted onto specimen stubs and allowed to air dry. Specimens were sputter coated with platinum and examined using a Hitachi S-2400 SEM. For TEM, acetolysed material was fixed with a 2% solution of osmium tetroxide (OsO<sub>4</sub>) in cacodylate buffer and prestained with 0.5% uranyl acetate, before embedding in Epon-araldite resin, following the method of Skvarla (1966). The pollen was then thin sectioned using a diamond knife, poststained with uranyl acetate and lead citrate, and subsequently examined in a Hitachi H-300 TEM or a Jeol JEM 1210 TEM. Palynological terminology follows Punt *et al.* (1994).

Pollen samples were databased and preparations are available for reference at the Palynology Unit, Jodrell Laboratory, Royal Botanic Gardens, Kew.

#### RESULTS

Pollen measurements are given in Table 2, and a summary of pollen characters is provided in Table 4.

##### *ATROXIMA* (FIGS 1, 2)

Pollen isopolar and prolate spheroidal in equatorial view;  $P \times E = (29)–38–(38) \times (31)–36.3–(40) \mu\text{m}$ ;  $P/E = 1.05$ . Seven to eight apertures, zonocolporate (Fig. 2); ectoapertures (colpi) measure  $(17)–21.1–(25) \times (1)–1.6–(3) \mu\text{m}$ ; endoapertures measure  $(3)–4–(6) \times 5–8 \mu\text{m}$  where endoapertures are separate, or are fused to form endocingula. Aperture apices pointed in *A. afzeliana* (Fig. 2), square in *A. liberia*,  $2.5 \mu\text{m}$  wide. Exine  $2 \mu\text{m}$  thick at poles,  $3 \mu\text{m}$  thick at equator. Surface ornamentation in *A. afzeliana* psilate (Fig. 2), punctate in *A. liberia*; aperture membrane finely granular.

##### *BADIERA*

See *Polygala*.

##### *BALGOYA* (FIGS 3–6)

Pollen isopolar and spheroidal in equatorial view (Figs 3–6);  $P \times E = (41)–45.9–(49) \times (44)–45.3–(50) \mu\text{m}$ ;  $P/E = 1.01$ . Tricolporate (Figs 4, 6). Ectoaper-

tures  $(10)–21.4–(33) \times (1)–2–(5) \mu\text{m}$ ; endoapertures  $(1)–3.6–(11) \times 3–6 \mu\text{m}$ . Exine  $(1)–1.7–(3) \mu\text{m}$  thick at poles. Surface ornamentation finely rugulate (Figs 5, 6); aperture membrane finely granular.

##### *BARNHARTIA* (FIGS 7–9)

Pollen isopolar and oblate spheroidal in equatorial view;  $P \times E = (29)–30.4–(32) \times (29)–31.8–(34) \mu\text{m}$ ;  $P/E = 0.95$ . Seven to ten apertures (Figs 7, 9), zonocolporate. Ectoapertures  $(18)–19.6–(22) \times (0.5)–2.5–(4) \mu\text{m}$ ; endoapertures  $(3)–3.2–(5) \mu\text{m}$  in length, endocingulate. Exine  $2 \mu\text{m}$  thick at poles. Surface ornamentation psilate (Figs 8, 9) with a finely granular aperture membrane.

##### *BREDEMEYERA* (FIGS 10–12)

Pollen isopolar and subprolate in equatorial view;  $P \times E = (23)–26.4–(32) \times (20)–22.5–(29) \mu\text{m}$ ;  $P/E = 1.17$ . Nine to 12 apertures (Fig. 10), zonocolporate. Ectoapertures long, nearly equal to polar length and narrow  $(18)–20.3–(23) \times (1)–1.1–(3.5) \mu\text{m}$ ; endoapertures  $(2)–2.9–(4) \times 3–5 \mu\text{m}$ , or endocingulate (Figs 10, 12). Exine  $(1.5)–1.6–(2) \mu\text{m}$  thick at poles. Surface ornamentation psilate to sparsely punctate (Fig. 11). Aperture membrane psilate.

##### *CARPOLOBIA* (FIGS 13, 14)

Pollen isopolar and spheroidal to oblate spheroidal in equatorial view;  $P \times E = (34)–41.3–(44) \times (34)–39–(45) \mu\text{m}$ ;  $P/E = 0.99$ . Ten to 15 apertures (Fig. 13), zonocolporate. Ectoapertures  $(21)–27–(32) \times (1)–2.2–(3) \mu\text{m}$ ; endoapertures  $(4)–6.7–(10) \times 3–8 \mu\text{m}$ , or endocingulate. Ectoapertures irregularly shaped in *C. alba*. Exine  $(1.5)–2.1–(3) \mu\text{m}$  thick at poles. Surface ornamentation perforate to microreticulate in *C. alba* (Figs 13, 14), and psilate and sparsely punctate in *C. goetzii*. Aperture membrane psilate (*C. alba*, Fig. 14) to finely granular (*C. goetzii*).

##### *COMESPERMA* (FIGS 15–17)

Pollen isopolar and subprolate to oblate spheroidal in equatorial view;  $P \times E = (34)–45.4–(58) \times (30)–43.3–(59) \mu\text{m}$ ;  $P/E = 1.05$ . Twelve to 18 apertures (Fig. 15), zonocolporate. Ectoapertures  $(25)–35.3–(47) \times (2)–3.2–(5) \mu\text{m}$ ; endoapertures  $(4)–7.8–(11) \mu\text{m}$  in length, endocingulate (Fig. 16). *Co. ericinum* has irregularly shaped ectoapertures. Margin of colpus membrane with granules distinctly more coarse than rest of membrane in all taxa studied, except *Co. calymega*. Exine  $(1)–2–(3) \mu\text{m}$  thick at poles. Surface ornamentation psilate (*Co. calymega*), very finely rugulate punctate (*Co. ericinum*) to punctate (*Co. virgatum*); where puncta are present, they are either

Table 4. Summary of pollen characters

| Genus                            | Number of apertures | Average number of apertures | Endocingulum or separate endoapertures | Isopolar/heteropolar | Operculum         | Larger granules around edge of aperture | Surface ornamentation                            |
|----------------------------------|---------------------|-----------------------------|----------------------------------------|----------------------|-------------------|-----------------------------------------|--------------------------------------------------|
| <i>Atrixima</i>                  | 7–8                 | 7.5                         | Both                                   | Isopolar             | Absent            | Absent                                  | Psilate or punctate                              |
| <i>Balgoya</i>                   | 3                   | 3                           | Separate                               | Isopolar             | Absent            | Absent                                  | Finely rugulate                                  |
| <i>Barnhartia</i>                | 7–10                | 8.5                         | Endocingulate                          | Isopolar             | Absent            | Absent                                  | Psilate                                          |
| <i>Bredemeyera</i>               | 9–12                | 11                          | Both                                   | Isopolar             | Absent            | Absent                                  | Psilate to finely punctate                       |
| <i>Carpolobia</i>                | 10–15               | 12.5                        | Both                                   | Isopolar             | Absent            | Absent                                  | Punctate to microreticulate, psilate to rugulate |
| <i>Comesperma</i>                | 12–18               | 15                          | Endocingulate                          | Isopolar             | Absent            | Mostly present                          | Punctate, psilate to finely rugulate             |
| <i>Diclidanthera</i>             | 8–9                 | 8.5                         | Separate                               | Isopolar             | Absent            | Absent                                  | Psilate                                          |
| <i>Epirixanthes</i>              | 15–18               | 16.5                        | Endocingulate                          | Isopolar             | Sometimes present | Absent                                  | Finely rugulate                                  |
| <i>Eriandra</i>                  | 6–8                 | 7                           | Both                                   | Isopolar             | Absent            | Absent                                  | Psilate, finely punctate                         |
| <i>Heterosamara</i>              | 24–33               | 28.5                        | Endocingulate                          | Heteropolar          | Absent            | Present                                 | Psilate to rugulate, punctate, lumina present    |
| <i>Monnina</i>                   | 12–16               | 14                          | Both                                   | Isopolar             | Absent            | Absent                                  | Psilate, perforate                               |
| <i>Moutabea</i>                  | 11–13               | 12                          | Separate                               | Isopolar             | Absent            | Absent                                  | Psilate to finely granular                       |
| <i>Muraltia</i>                  | 8–16                | 12                          | Both                                   | Isopolar             | Absent            | Present                                 | Psilate, lumina present or absent                |
| <i>Nylandtia</i>                 | 12–14               | 13                          | Both                                   | Isopolar             | Absent            | Present                                 | Psilate, lumina present or absent                |
| <i>Polygala</i>                  | 8–22                | 15                          | Both                                   | Isopolar             | Absent            | Sometimes present                       | Coarsely perforate, rugulate–fossulate           |
| <i>Subgenus I: Phlebotaeonia</i> | 10–12               | 11                          | Both                                   | Isopolar             | Absent            | Present                                 | Psilate to punctate, sometimes with lumina       |
| <i>Subgenus II: Badiera</i>      | 8–18                | 13                          | Both                                   | Isopolar             | Absent            | Absent                                  | Psilate–perforate                                |
| <i>Subgenus III: Hebecarpa</i>   | 18–22               | 20                          | Endocingulate                          | Isopolar             | Absent            | Absent                                  | Psilate–perforate                                |

Table 4. *Continued*

| Genus                                              | Number of apertures | Average number of apertures | Endocingulum or separate endoapertures | Isopolar/heteropolar | Operculum         | Larger granules around edge of aperture | Surface ornamentation                                           |
|----------------------------------------------------|---------------------|-----------------------------|----------------------------------------|----------------------|-------------------|-----------------------------------------|-----------------------------------------------------------------|
| <i>Subgenus IV:</i><br><i>Acanthocladius</i>       | 8–10                | 9                           | Separate                               | Isopolar             | Absent            | Present                                 | Fossulate                                                       |
| <i>Subgenus V: Ligustrina</i>                      | 8–9                 | 8.5                         | Endocingulate                          | Isopolar             | Present           | Absent                                  | Psilate to granular to rugulate                                 |
| <i>Subgenus VI:</i><br><i>Brachytropis</i>         | 11–14               | 12.5                        | Endocingulate                          | Isopolar             | Absent            | Present                                 | Finely granular with lumina                                     |
| <i>Subgenus VII:</i><br><i>Gymnospora</i>          | No material         |                             |                                        |                      |                   |                                         |                                                                 |
| <i>Subgenus VIII:</i><br><i>Hebeclada</i>          | 8–13                | 10.5                        | Both                                   | Isopolar             | Absent            | Present                                 | Psilate                                                         |
| <i>Subgenus IX:</i><br><i>Rhinotropis</i>          | No material         |                             |                                        |                      |                   |                                         |                                                                 |
| <i>Subgenus X: Chodatia,</i><br><i>P. arillata</i> | 17–18               | 17.5                        | Endocingulate                          | Isopolar             | Absent            | Present                                 | Psilate with ring of depressions                                |
| <i>Subgenus X: Chodatia,</i><br><i>P. arillata</i> | 17–21               | 19                          | Endocingulate                          | Heteropolar          | Absent            | Absent                                  | Psilate, punctate, perforate or rugulate, sometimes with lumina |
| <i>Subgenus XI:</i><br><i>Chamaebuxus</i>          | 16–18               | 17                          | Endocingulate                          | Isopolar             | Absent            | Absent                                  | Psilate                                                         |
| <i>Subgenus XII: Polygala</i>                      | 9–21                | 15                          | Both                                   | Isopolar             | Sometimes present | Sometimes present                       | Psilate to finely granular, sometimes with lumina               |
| <i>Salomonina</i>                                  | 13–14               | 13.5                        | Endocingulate                          | Isopolar             | Absent            | Absent                                  | Rugulate to verrucate                                           |
| <i>Securidaca</i>                                  | 8–13                | 10.5                        | Separate                               | Isopolar             | Sometimes present | Present                                 | Psilate to granular, sometimes perforate                        |
| <i>Xanthophyllum</i>                               | 5–11                | 8                           | Endocingulate                          | Isopolar             | Absent            | Absent                                  | Psilate, punctate                                               |



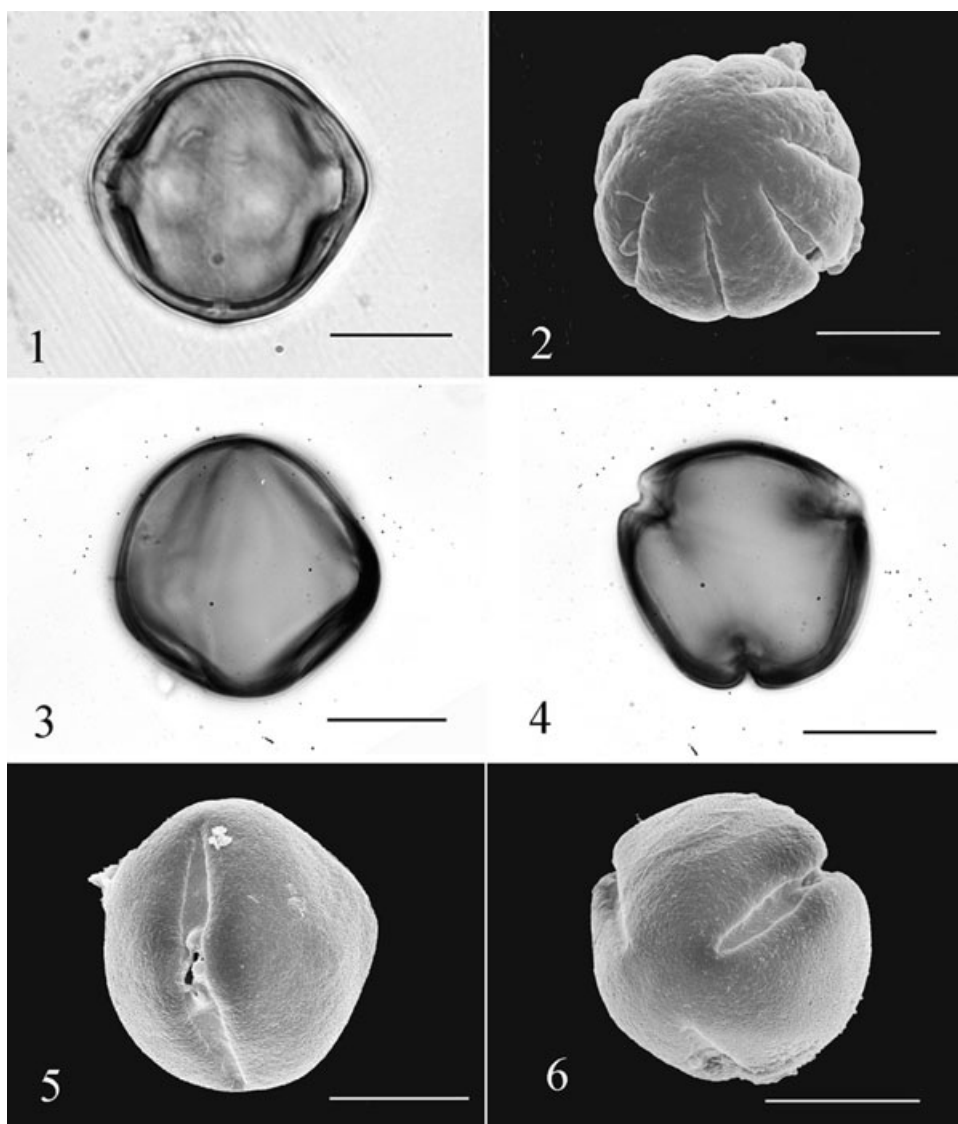

**Figures 1–6.** Fig. 1 *Atroxima liberia*, equatorial view of whole grain (light microscopy, LM). Fig. 2. *Atroxima afzeliana*, oblique polar view of whole grain showing eight apertures, pointed aperture apices, and psilate–punctate surface ornamentation (scanning electron microscopy, SEM). Fig. 3. *Balgoya pacifica*, equatorial view of whole grain (LM). Fig. 4. *Balgoya pacifica*, polar view of whole grain showing three apertures (LM). Fig. 5. *Balgoya pacifica*, equatorial view of whole grain showing colpulate aperture and finely rugulate surface ornamentation (SEM). Fig. 6. *Balgoya pacifica*, oblique polar view of whole grain showing three apertures and finely rugulate surface ornamentation (SEM). Scale bars: Figs 1, 2, 10  $\mu\text{m}$ ; Figs 3–6, 20  $\mu\text{m}$ .

small in mesocolpial regions and larger (c. 2  $\mu\text{m}$ ) in apocolpial regions (*Co. ericinum*, Fig. 15), or a uniform size (*Co. virgatum*); lumina irregularly shaped (0.5–2  $\mu\text{m}$ ) in apocolpial regions, spaced 1–2.5  $\mu\text{m}$  apart with granular lumen surface (*Co. virgatum*); aperture membrane finely granular. In thin section, columellae short and unbranched (0.2  $\mu\text{m}$ ); foot layer 0.2  $\mu\text{m}$ ; endexine 0.7  $\mu\text{m}$  with foraminae (Ferguson, 1987: Fig. 17).

#### DICLIDANTHERA (FIG. 18)

Pollen isopolar and prolate spheroidal in equatorial view;  $P \times E = (34)–38–(40) \times (32)–36.1–(40) \mu\text{m}$ ;  $P/E = 1.05$ . Eight to nine apertures, zonocolporate. Ectoapertures (22)–24.7–(27)  $\times$  (1)–1.7–(2)  $\mu\text{m}$ ; endoapertures (2)–2.4–(3)  $\times$  (4)–5.3–(7)  $\mu\text{m}$ . Exine 2–3  $\mu\text{m}$  thick at poles. Surface ornamentation psilate with psilate aperture membrane (Fig. 18).

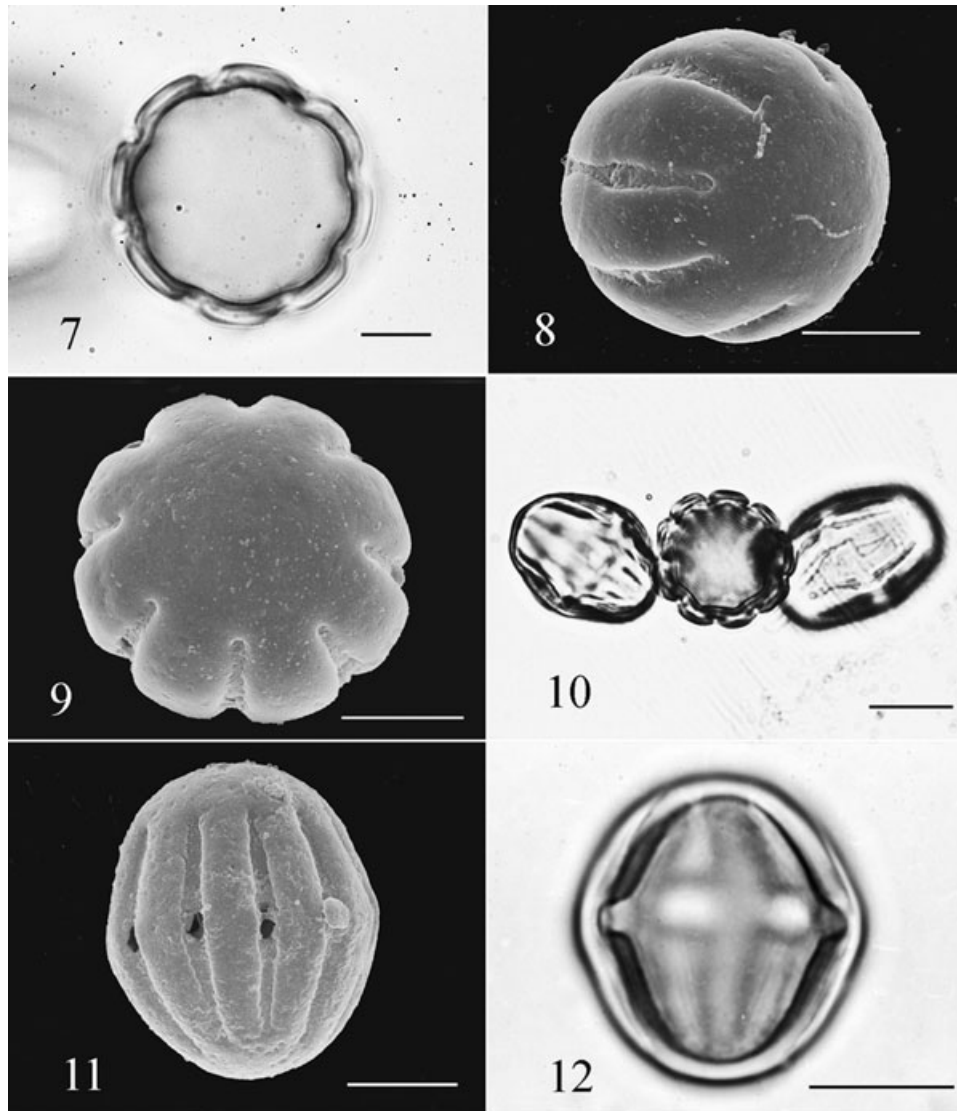

**Figures 7–12.** Fig. 7 *Barnhartia floribunda*, polar view of whole grain showing eight apertures (light microscopy, LM). Fig. 8 *Barnhartia floribunda*, oblique equatorial view of whole grain showing psilate surface ornamentation (scanning electron microscopy, SEM). Fig. 9 *Barnhartia floribunda*, polar view of whole grain showing eight apertures and psilate surface ornamentation (SEM). Fig. 10 *Bredemeyera microphylla*, group of three grains (LM). Fig. 11 *Bredemeyera microphylla*, equatorial view of whole grain (SEM). Fig. 12 *Bredemeyera lucida*, equatorial view of whole grain (LM). Scale bars: Figs 7–9, 11, 12, 10  $\mu\text{m}$ ; Fig. 10, 20  $\mu\text{m}$ .

**Figures 13–20.** Fig. 13 *Carpolobia alba*, polar view of whole grain showing 13 apertures (scanning electron microscopy, SEM). Fig. 14 *Carpolobia alba*, close up of aperture showing perforate surface ornamentation and psilate aperture surface (SEM). Fig. 15 *Comesperma ericinum*, polar view of whole grain showing 16 apertures and finely punctate–rugulate surface ornamentation with larger puncta in apocolpial region (SEM). Fig. 16 *Comesperma virgatum*, equatorial view of whole grain showing endocingulum (light microscopy, LM). Fig. 17 *Comesperma ericinum*, section through mesocolpial wall (transmission electron microscopy, TEM). Fig. 18 *Diclidanthera penduliflora*, equatorial view of whole grain showing psilate surface ornamentation (SEM). Fig. 19 *Epirixanthes papuana*, equatorial view of whole grain showing endocingulum and thickened aperture walls (LM). Fig. 20 *Epirixanthes papuana*, equatorial view of whole grain showing finely rugulate surface ornamentation and thickened aperture walls (SEM). Scale bars: Figs 13, 15, 16, 18–20, 20  $\mu\text{m}$ ; Fig. 14, 5  $\mu\text{m}$ ; Fig. 17, 2  $\mu\text{m}$ .

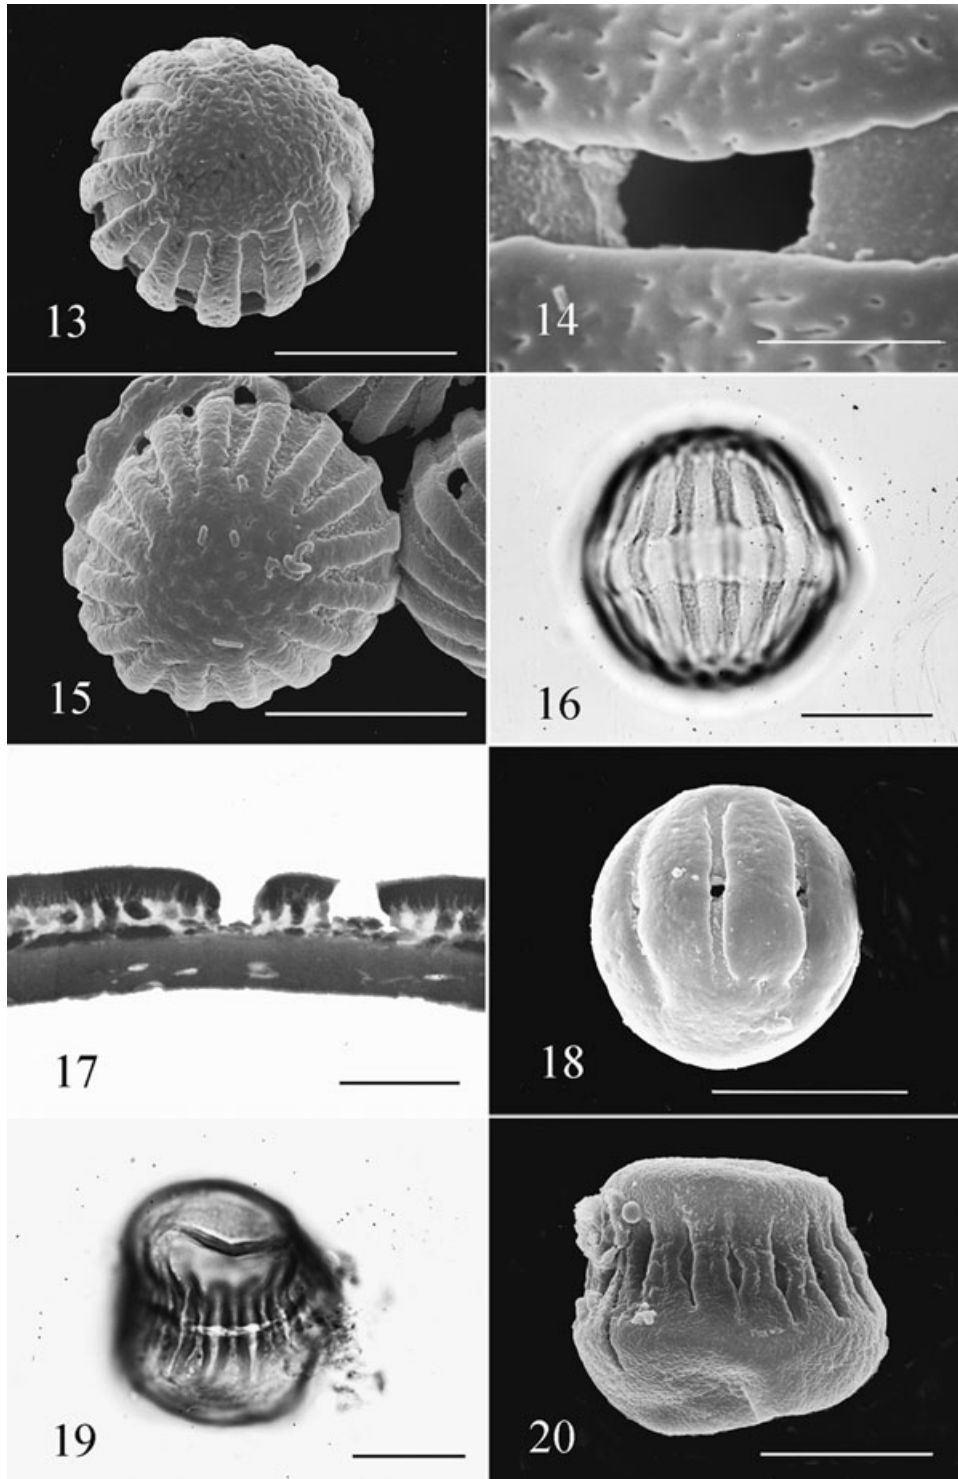

*EPIRIXANTHES* (FIGS 19, 20)

Pollen isopolar and prolate spheroidal in equatorial view;  $P \times E = (39)–39.8–(48) \times (33)–37.8–(43) \mu\text{m}$ ;  $P/E = 1.11$ . Fifteen to 18 apertures, zonocolporate.

Ectoapertures (10)–13.4–(16)  $\times$  2  $\mu\text{m}$ ; endoapertures (1)–1.4–(3)  $\mu\text{m}$  in length, endocingulate (Fig. 19). Exine 1.5  $\mu\text{m}$  thick at poles, with exine thickening (costae) around the ectoapertures. In *E. papuana*, the thinner walled areas at the poles tend to collapse

following acetolysis (Figs 19, 20). Surface ornamentation finely rugulate, smoother on exine bands covering the endocingulum (Fig. 20); aperture membrane finely granular. Exine visible over the endoaperture in *E. elongata* suggests the possible presence of opercula (requires TEM investigation).

#### ERIANDBRA (FIGS 21–23)

Pollen isopolar and oblate spheroidal in equatorial view;  $P \times E = (27)–26.2–(32) \times (25)–26.6–(30) \mu\text{m}$ ;  $P/E = 0.98$ . Six to eight apertures (Fig. 23), zonocolporate. Ectoapertures  $(17)–18.4–(20) \times (1)–1.2–(2) \mu\text{m}$ ; endoapertures  $(4)–4.4–(5) \mu\text{m}$  in length, endocingulate (Fig. 21). Exine  $2 \mu\text{m}$  thick at poles. Surface ornamentation psilate and sparsely punctate (Fig. 22); aperture membrane finely granular. In thin section, columellae short (c.  $0.1 \mu\text{m}$ ); foot layer c.  $0.1 \mu\text{m}$ ; endexine  $1 \mu\text{m}$  with foraminae (Fig. 23).

#### HETEROSAMARA (FIGS 24–28)

Pollen heteropolar, kidney-shaped, and oblate to peroblate in equatorial view (Figs 24, 26–28);  $P \times E = (9)–28.3–(47) \times (30)–54.6–(81) \mu\text{m}$ ;  $P/E = 0.5$ . Twenty-four to 33 apertures. Ectoapertures  $(11)–15.8–(27) \times (1)–1.9–(3) \mu\text{m}$ ; ectoaperture length variable depending on their position on the grain (Figs 24–26); position of endoaperture along the length of the ectoaperture not always central and variable within a sample (Figs 25, 26); endoapertures  $(1)–2.6–(6) \mu\text{m}$  in length, endocingulate. Exine  $(2)–3.8–(8) \mu\text{m}$  thick at poles. Surface ornamentation psilate in mesocolpial regions; punctate in apocolpial regions; apocolpial regions with regularly spaced circular lumina or foveolae; lumina  $(1)–1.3–(2) \mu\text{m}$ ; distance between lumina  $(0.4)–1.6–(2.5) \mu\text{m}$ ; lumen surface granular; aperture membrane granular. *Heterosamara cabrae* has circular lumina and rugulate ornamentation on its small apocolpial region, the larger apocolpial region has wide occasionally branching striations ( $1.5–2 \mu\text{m}$ ). These striations have rugulate–punctate ornamentation separated by grooves with granulate ornamentation. The ectoaper-

ture apices extend only into the small apocolpial region. The ectoaperture apices are asymmetrical in *H. cabrae* and *H. carrissoana* (Figs 24, 25); the ectoaperture apices are rounded at one end and pointed at the other. *Heterosamara umbonata* does not have punctate ornamentation in the apocolpial regions. In *H. carrissoana*, the lumina surfaces are punctate. Aperture membrane psilate to granular, with a layer of granular material around the edge of the ectoaperture margins (Figs 24, 25).

#### MONNINA (FIGS 29–31)

Pollen isopolar and prolate spheroidal to oblate spheroidal in equatorial view;  $P \times E = (29)–40.2–(49) \times (29)–29.9–(50) \mu\text{m}$ ;  $P/E = 1.00$ . Twelve to 16 apertures (Fig. 29), zonocolporate. Ectoapertures  $(19)–28.5–(40) \times (1)–2.1–(3) \mu\text{m}$ ; endoapertures  $(1)–3.2–(6) \times 3–8 \mu\text{m}$  or endocingulate (Fig. 31). Exine  $(2)–2.9–(3.5) \mu\text{m}$  thick. Surface ornamentation psilate–perforate (lumina less than  $1 \mu\text{m}$  in diameter) (Fig. 30); perforations separated by  $1–5 \mu\text{m}$ ; free-standing projecting elements from some perforations (to  $1 \mu\text{m}$  length); psilate aperture membrane (Fig. 30).

#### MOUTABEA (FIG. 32)

Pollen isopolar and prolate spheroidal in equatorial view;  $P \times E = (25)–29.4–(36) \times (24)–27.4–(32) \mu\text{m}$ ;  $P/E = 1.07$ . Eleven to 13 apertures, zonocolporate. Ectoapertures  $(20)–20.3–(21) \times 1 \mu\text{m}$ ; endoapertures  $(1)–1.6–(2) \times (1)–1.5–(2) \mu\text{m}$ . Exine  $4 \mu\text{m}$  thick at poles. Surface ornamentation psilate to finely granular; aperture membrane finely granular.

#### MURALTIA (FIGS 33–39)

Pollen isopolar and prolate spheroidal to suboblate in equatorial view;  $P \times E = (21)–36.9–(59) \times (21)–36.8–(52) \mu\text{m}$ ;  $P/E = 0.99$ . Eight to 16 apertures (Fig. 34), zonocolporate. Ectoapertures  $(14)–27.2–(44) \times (1)–5.3–(11) \mu\text{m}$ ; endoapertures  $(3)–4.78–(8) \times 4–13 \mu\text{m}$  or endocingulate (Figs 37, 38). *Muraltia filiformis* has a small apocolpial region (c.  $10 \mu\text{m}$  in

**Figures 21–28.** Fig. 21. *Eriandra fragrans*, equatorial view of whole grain showing endocingulum (light microscopy, LM). Fig. 22. *Eriandra fragrans*, equatorial view of whole grain showing psilate, sparsely punctate surface ornamentation (scanning electron microscopy, SEM). Fig. 23. *Eriandra fragrans*, transverse section (transmission electron microscopy, TEM). Fig. 24. *Heterosamara cabrae*, oblique equatorial view of whole grain showing heteropolar grain and variable size and shape of the apertures, which is related to their position on the grain. Aperture apices are rounded at one end and pointed at the opposite end (SEM). Fig. 25. *Heterosamara carrissoana*, close up of aperture showing the asymmetrical position of the endoapertures (SEM). Fig. 26. *Heterosamara carrissoana*, equatorial view of whole grain showing psilate surface ornamentation in mesocolpial regions and circular lumina in apocolpial regions (SEM). Fig. 27. *Heterosamara carrissoana*, equatorial view of whole grain (LM). Fig. 28. *Heterosamara tatarinowii*, polar view of whole grain (SEM). Scale bars: Figs 24, 26–28,  $20 \mu\text{m}$ ; Figs 21–23, 25,  $10 \mu\text{m}$ .



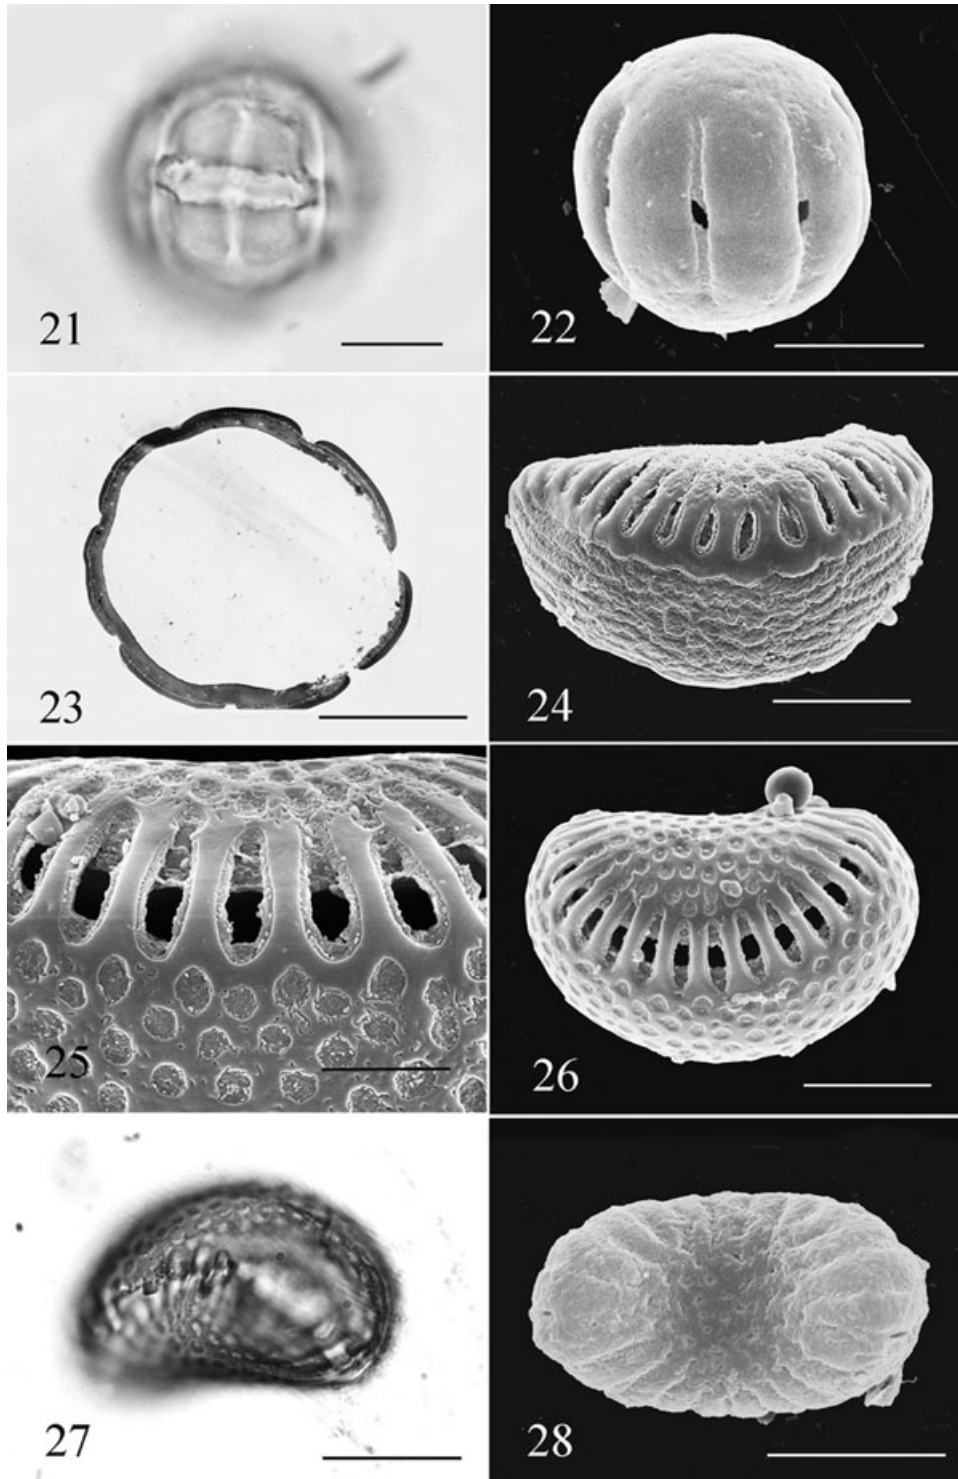

diameter). Exine (1)–2–(3)  $\mu\text{m}$  thick at poles. Surface ornamentation psilate; lumina present on apocolpia (except *M. flanaganii* and *M. mixta*) (Figs 34–36); lumina 0.5–2  $\mu\text{m}$  in diameter with coarsely granular lumen surface, lumina branching in *M. heisteria*;

aperture membrane granular (Figs 34–36); ectoaperture margin in *M. serpylloides* has distinctly larger granules. In thin section, columellae 0.2  $\mu\text{m}$  and unbranched; foot layer 0.1  $\mu\text{m}$ ; endexine 0.9  $\mu\text{m}$  thick at pole with foraminae (Fig. 39).

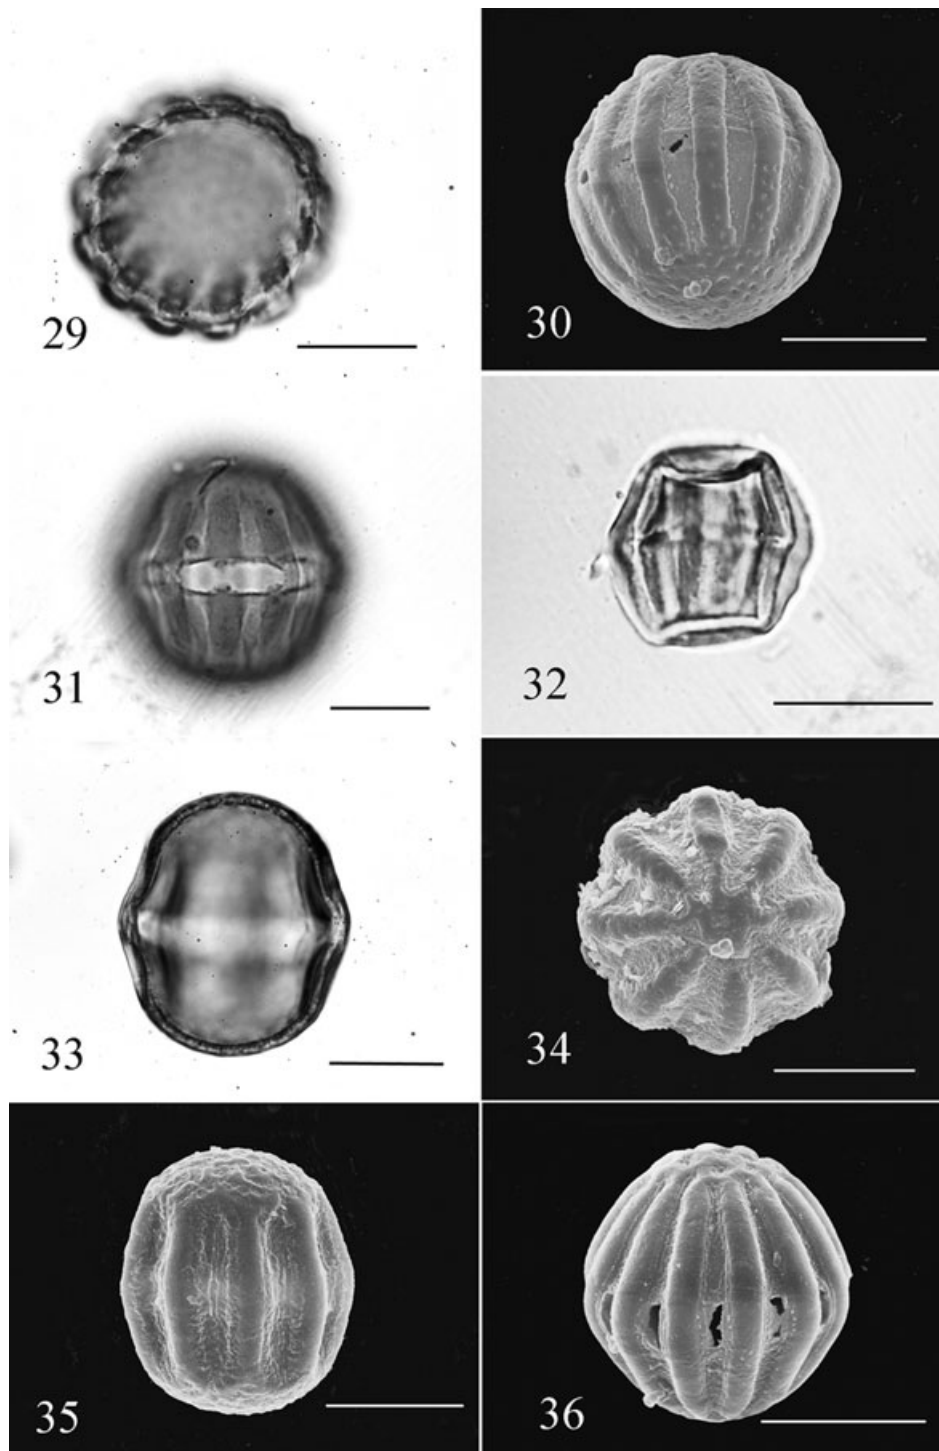

**Figures 29–36.** Fig. 29. *Monnina xalepensis*, polar view of whole grain showing 13 apertures (light microscopy, LM). Fig. 30. *Monnina xalepensis*, equatorial view of whole grain showing psilate–perforate surface ornamentation (scanning electron microscopy, SEM). Fig. 31. *Monnina richardiana*, equatorial view of whole grain showing endocingulum (LM). Fig. 32. *Moutabea guianensis*, equatorial view of whole grain (LM). Fig. 33. *Muraltia heisteria*, equatorial view of whole grain (LM). Fig. 34. *Muraltia filiformis*, polar view of whole grain showing eight apertures (SEM). Fig. 35. *Muraltia heisteria*, equatorial view of whole grain showing lumina present on apocolpial regions, psilate mesocolpial regions, and granular aperture membranes (SEM). Fig. 36. *Muraltia serpylloides*, equatorial view of whole grain showing similar ornamentation but more apertures when compared with Figure 35 (SEM). Scale bars, 20  $\mu$ m.



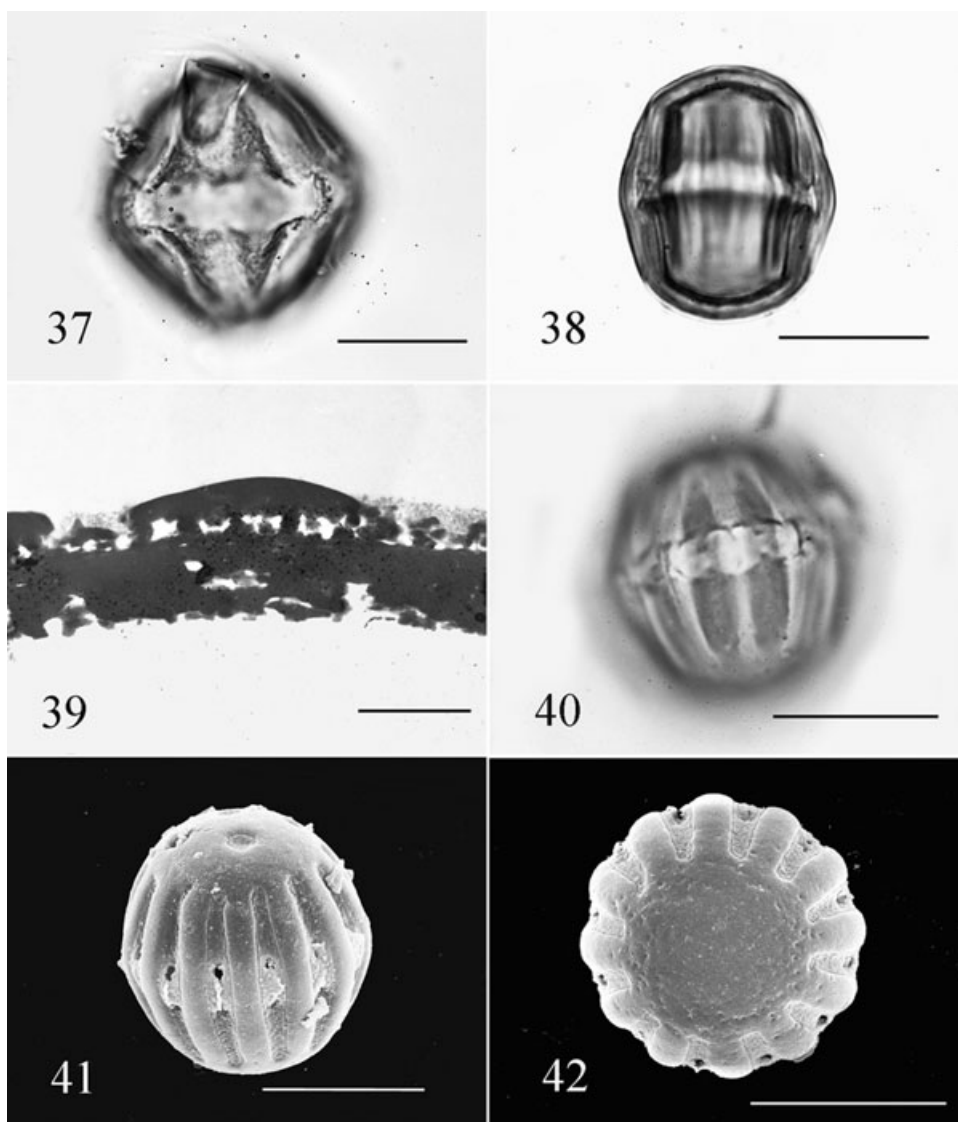

**Figures 37–42.** Fig. 37. *Muraltia filiformis*, equatorial view of whole grain showing endocingulum (light microscopy, LM). Fig. 38. *Muraltia thunbergii*, equatorial view of whole grain showing endocingulum (LM). Fig. 39. *Muraltia heisteria*, mesocolpial wall section (transmission electron microscopy, TEM). Fig. 40. *Nylandtia spinosa*, equatorial view of whole grain showing endocingulum (LM). Fig. 41. *Nylandtia spinosa*, equatorial view of whole grain showing psilate surface ornamentation with few lumina present in apocolpial region (scanning electron microscopy, SEM). Fig. 42. *Nylandtia spinosa*, polar view of whole grain showing psilate–punctate surface ornamentation in apocolpial region (SEM). Scale bars: Figs 37, 38, 40–42, 20 µm; Fig. 39, 2 µm.

*NYLANDTIA* (FIGS 40–42)

Pollen isopolar and prolate spheroidal in equatorial view;  $P \times E = (28)–34.6–(38) \times (26)–33.3–(35) \mu\text{m}$ ;  $P/E = 1.03$ . Twelve to 14 apertures (Fig. 42), zonocolporate. Ectoapertures  $(24)–24.8–(26) \times (3)–3.6–(4) \mu\text{m}$ ; endoapertures  $5 \times 5 \mu\text{m}$  or endocingulate (Fig. 40). Exine 2 µm thick at poles. Surface ornamentation psilate and punctate in apocolpial regions (Figs 41, 42); large lumina in apocolpial regions sparsely present (Fig. 41) or absent (Fig. 42); aperture

membrane granular; ectoaperture margin with distinctly larger granules.

*PHLEBOTAENIA*

See *Polygala*.

*POLYGALA* (FIGS 43–86)

Pollen isopolar to heteropolar and prolate to oblate in equatorial view;  $P \times E = (22)–32.9–(93) \times (16)–$

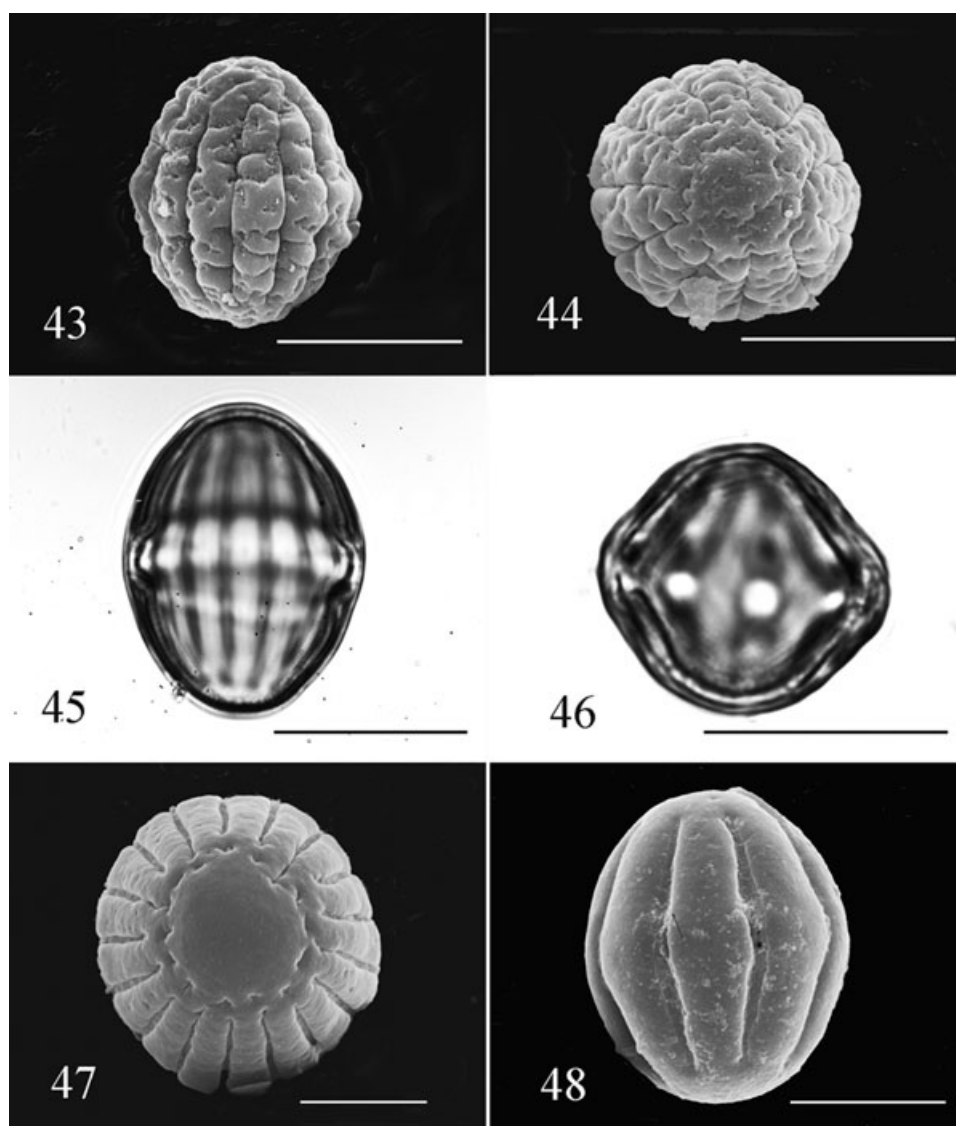

**Figures 43–48.** Fig. 43. *Phlebotanea cowellii* (= *Polygala cowellii*), equatorial view of whole grain showing coarsely rugulate–fossulate surface ornamentation (scanning electron microscopy, SEM). Fig. 44. *Phlebotanea cowellii* (= *Polygala cowellii*), polar view of whole grain showing 11 apertures (SEM). Fig. 45. *Badiera caracasana* (= *Polygala caracasana*), equatorial view of whole grain showing endocingulum (light microscopy, LM). Fig. 46. *Badiera oblongata* (= *Polygala oblongata*), equatorial view of whole grain showing discrete endoapertures (LM). Fig. 47. *Badiera panaea* (= *Polygala panaea*), polar view of whole grain showing a ring of depressions above aperture apices, psilate apocolpium, and 17 apertures (LM). Fig. 48. *Badiera panaea* (= *Polygala panaea*), equatorial view of whole grain showing psilate surface ornamentation (SEM). Scale bars, 20  $\mu\text{m}$ .

28.4–(65)  $\mu\text{m}$ ;  $P/E = 1.16$ . Eight to 22 apertures, zonocolporate. Ectoapertures (13)–21–(45)  $\times$  (1)–1.9–(11)  $\mu\text{m}$ ; endoapertures (1)–3.8–(14)  $\times$  3–12  $\mu\text{m}$  or endocingulate. Exine (1)–1.8–(5)  $\mu\text{m}$  thick at poles. Surface ornamentation psilate to granular; lumina absent or present; lumina, where present, sometimes restricted to apocolpial regions, sometimes also present in mesocolpial regions; lumen surface granular; aperture membrane finely to coarsely granular.

*Subgenus I Phlebotanea* (Griseb.) S.F. Blake (= genus *Phlebotanea* sensu Griseb.) (Figs 43, 44)  
Species examined: *Phlebotanea cowellii*, *Ph. cuneata*. Pollen isopolar and subprolate to prolate spheroidal in equatorial view;  $P \times E = (26)–31.6–(40) \times (21)–27.1–(30) \mu\text{m}$ ;  $P/E = 1.16$ . Ten to 12 apertures, zonocolporate. Ectoapertures long and narrow (17)–23.6–(31)  $\times$  1  $\mu\text{m}$ ; endoapertures (1)–3.1–(4)  $\times$  4–7  $\mu\text{m}$  (endocingulate in *Ph. cowellii*). Exine 2  $\mu\text{m}$

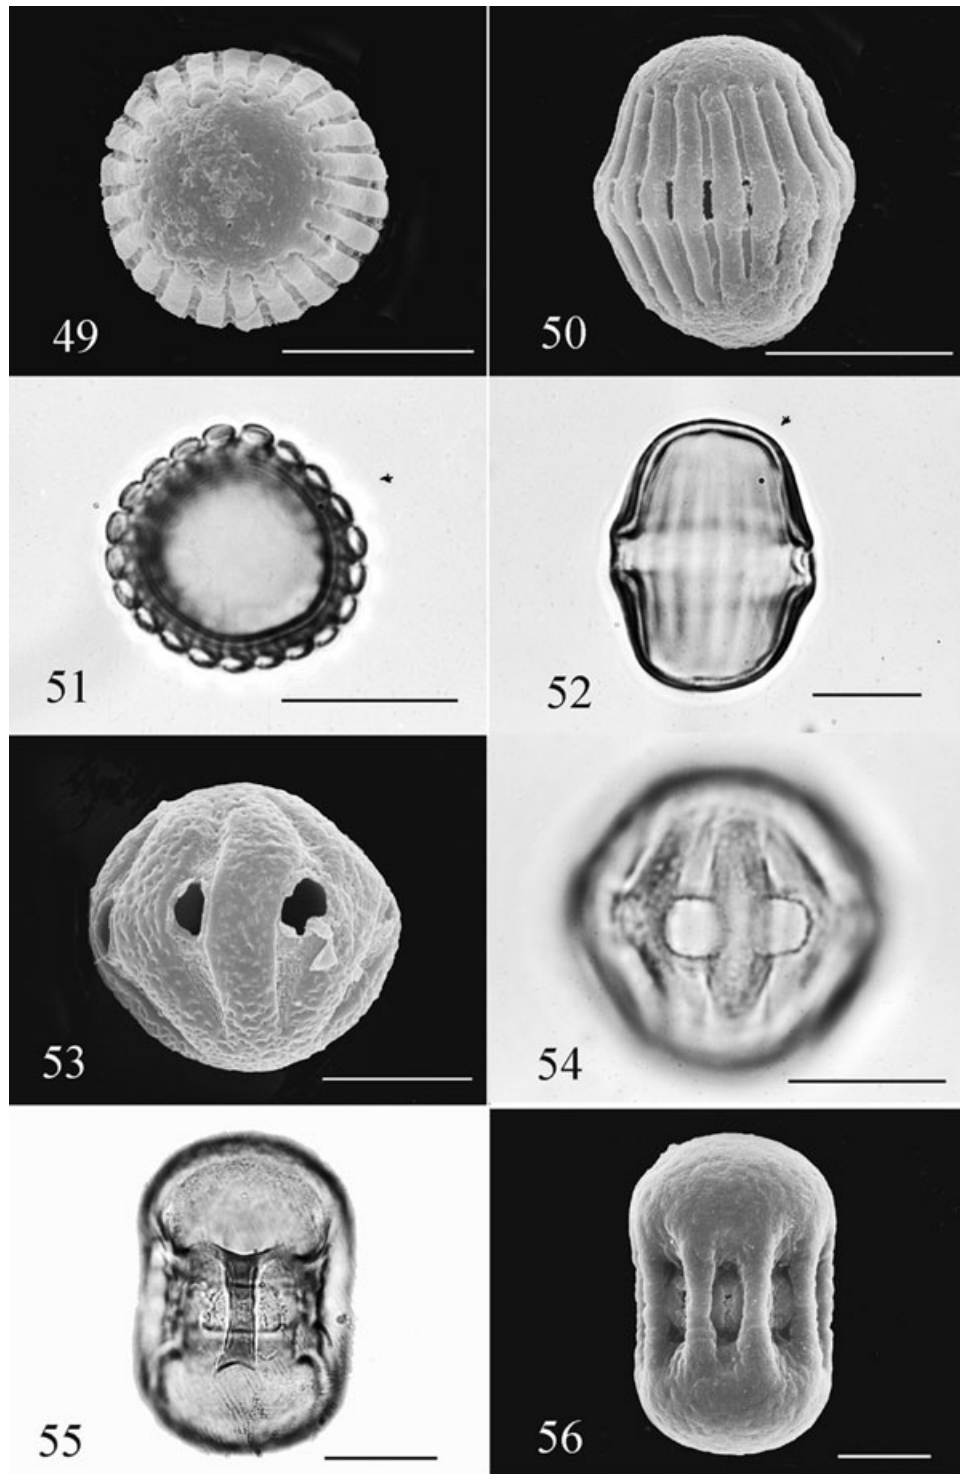

**Figures 49–56.** Fig. 49. *Polygala obscura*, polar view of whole grain showing 22 apertures (scanning electron microscopy, SEM). Fig. 50. *Polygala obscura*, equatorial view of whole grain (SEM). Fig. 51. *Polygala obscura*, polar view of whole grain showing 21 apertures (light microscopy, LM). Fig. 52. *Polygala obscura*, equatorial view of whole grain showing endocingulum (LM). Fig. 53. *Polygala klotzschii*, equatorial view of whole grain showing fossulate surface ornamentation (SEM). Fig. 54. *Polygala klotzschii*, equatorial view of whole grain showing discrete endoapertures (LM). Fig. 55. *Polygala laureola*, equatorial view of whole grain (LM). Fig. 56. *Polygala laureola*, equatorial view of whole grain (SEM). Scale bars, 20  $\mu$ m.

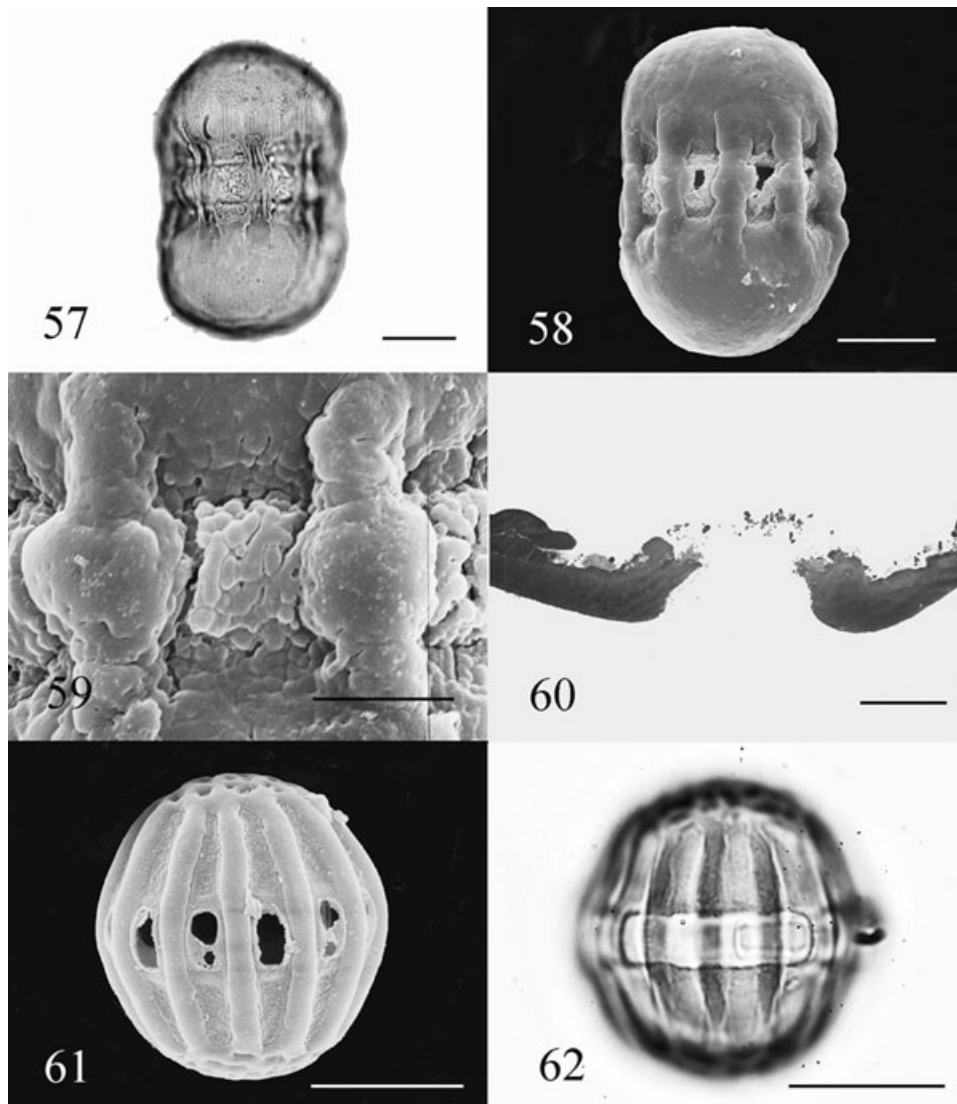

**Figures 57–62.** Fig. 57. *Polygala ligustrioides*, equatorial view of whole grain (light microscopy, LM). Fig. 58. *Polygala ligustrioides*, equatorial view of whole grain showing psilate surface ornamentation (scanning electron microscopy, SEM). Fig. 59. *Polygala ligustrioides*, detail of aperture showing operculum (SEM). Fig. 60. *Polygala ligustrioides*, section through endoaperture area (transmission electron microscopy, TEM). Fig. 61. *Polygala microphylla*, equatorial view of whole grain showing finely granular mesocolpial surface ornamentation and lumina visible in apocolpial regions (SEM). Fig. 62. *Polygala microphylla*, equatorial view of whole grain showing endocingulum (LM). Scale bars: Figs 57, 58, 61, 62, 20  $\mu\text{m}$ ; Fig. 59, 5  $\mu\text{m}$ ; Fig. 60, 2  $\mu\text{m}$ .

thick at poles. Surface ornamentation coarsely perforate, or coarsely perforate and coarsely rugulate-fossulate (Figs 43, 44); lumina 0.5  $\mu\text{m}$  wide separated by 0.5–2.5  $\mu\text{m}$ ; lumina surfaces coarsely granular and lumina branching in *Ph. cowellii*; aperture membrane granular, although ectoapertures are too narrow to observe the detail of the membrane in *Ph. cowellii*. In *Ph. cunneata*, the ectoaperture margins have distinctly larger granules.

*Subgenus II Badiera* (DC.) S.F. Blake (=genus *Badiera sensu DC.*) (Figs 45–48)

Species examined: *Badiera acuminata*, *B. caracasana*, *B. diversifolia*, *B. fuertesii*, *B. oblongata*, *B. penaea*. Pollen isopolar and subprolate to oblate spheroidal in equatorial view;  $P \times E = (20)–29.5–(49) \times (16)–31.2–(38) \mu\text{m}$ ;  $P/E = 1.1$ . Eight to 18 apertures (generally eight to 12, with exception of *B. caracasana*, Fig. 45, which has 17–18), zonocolporate. Ectoapertures  $(10)–21.4–(33) \times (1)–2–(5) \mu\text{m}$ ;



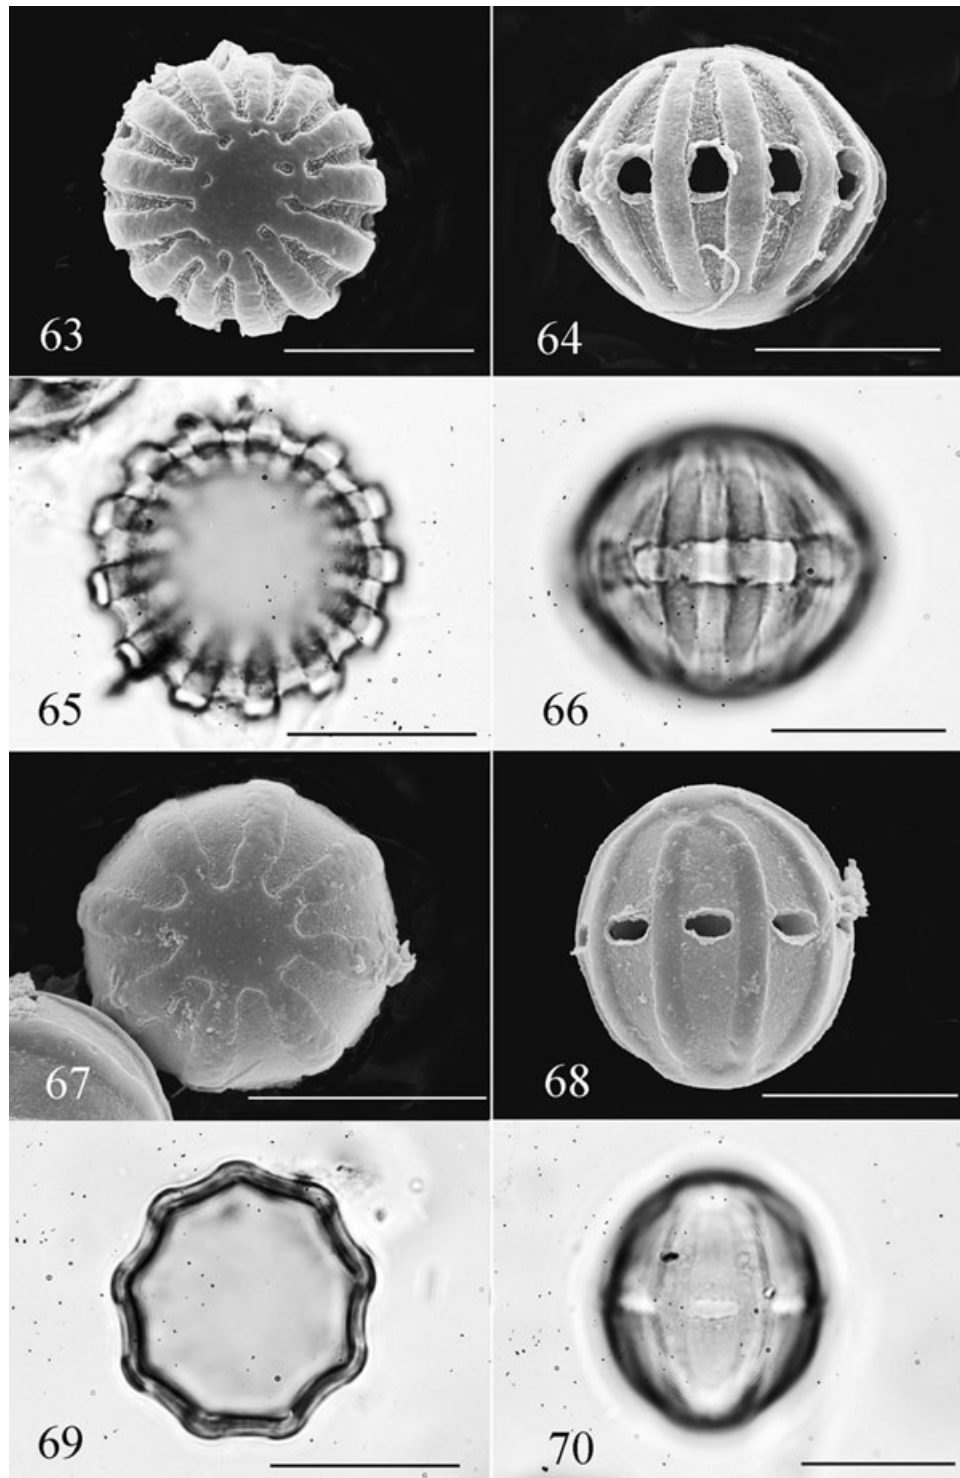

**Figures 63–70.** Fig. 63. *Polygala hebeclada*, polar view of whole grain showing 13 apertures (scanning electron microscopy, SEM). Fig. 64. *Polygala hebeclada*, equatorial view of whole grain (SEM). Fig. 65. *Polygala hebeclada*, polar view of whole grain showing 13 apertures (light microscopy, LM). Fig. 66. *Polygala hebeclada*, equatorial view of whole grain showing endocingulum (LM). Fig. 67. *Polygala senega*, polar view of whole grain showing eight apertures (SEM). Fig. 68. *Polygala senega*, equatorial view of whole grain (SEM). Fig. 69. *Polygala senega*, polar view of whole grain showing nine apertures (LM). Fig. 70. *Polygala senega*, equatorial view of whole grain showing discrete endoapertures (LM). Scale bars, 20  $\mu$ m.

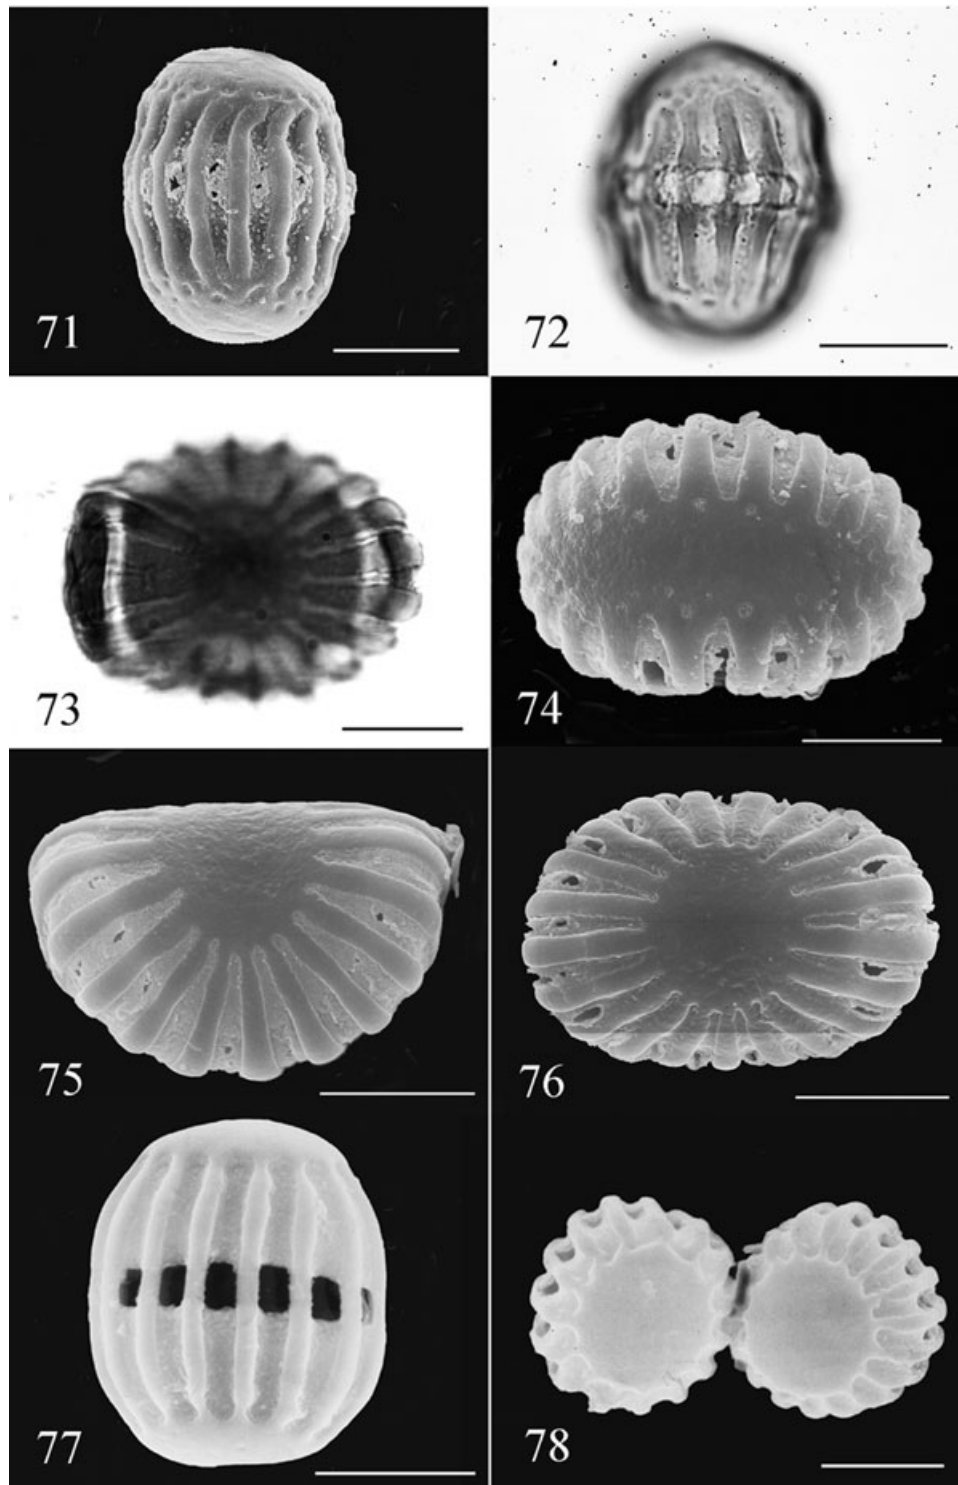

**Figures 71–78.** Fig. 71. *Polygala arillata*, equatorial view of whole grain (scanning electron microscopy, SEM). Fig. 72. *Polygala arillata*, equatorial view of whole grain showing endocingulum (light microscopy, LM). Fig. 73. *Polygala wattersii*, polar view of whole grain; endocingula can be seen on the left and right (LM). Fig. 74. *Polygala wattersii*, opposite polar view of whole grain compared with Figure 73 (SEM). Fig. 75. *Polygala wattersii*, oblique polar view of whole grain (SEM). Fig. 76. *Polygala wattersii*, polar view of whole grain showing 21 apertures (cf. Fig. 73) (SEM). Fig. 77. *Polygala chamaebuxus*, equatorial view of whole grain (SEM). Fig. 78. *Polygala chamaebuxus*, polar view of two grains (SEM). Scale bars, 20  $\mu$ m.



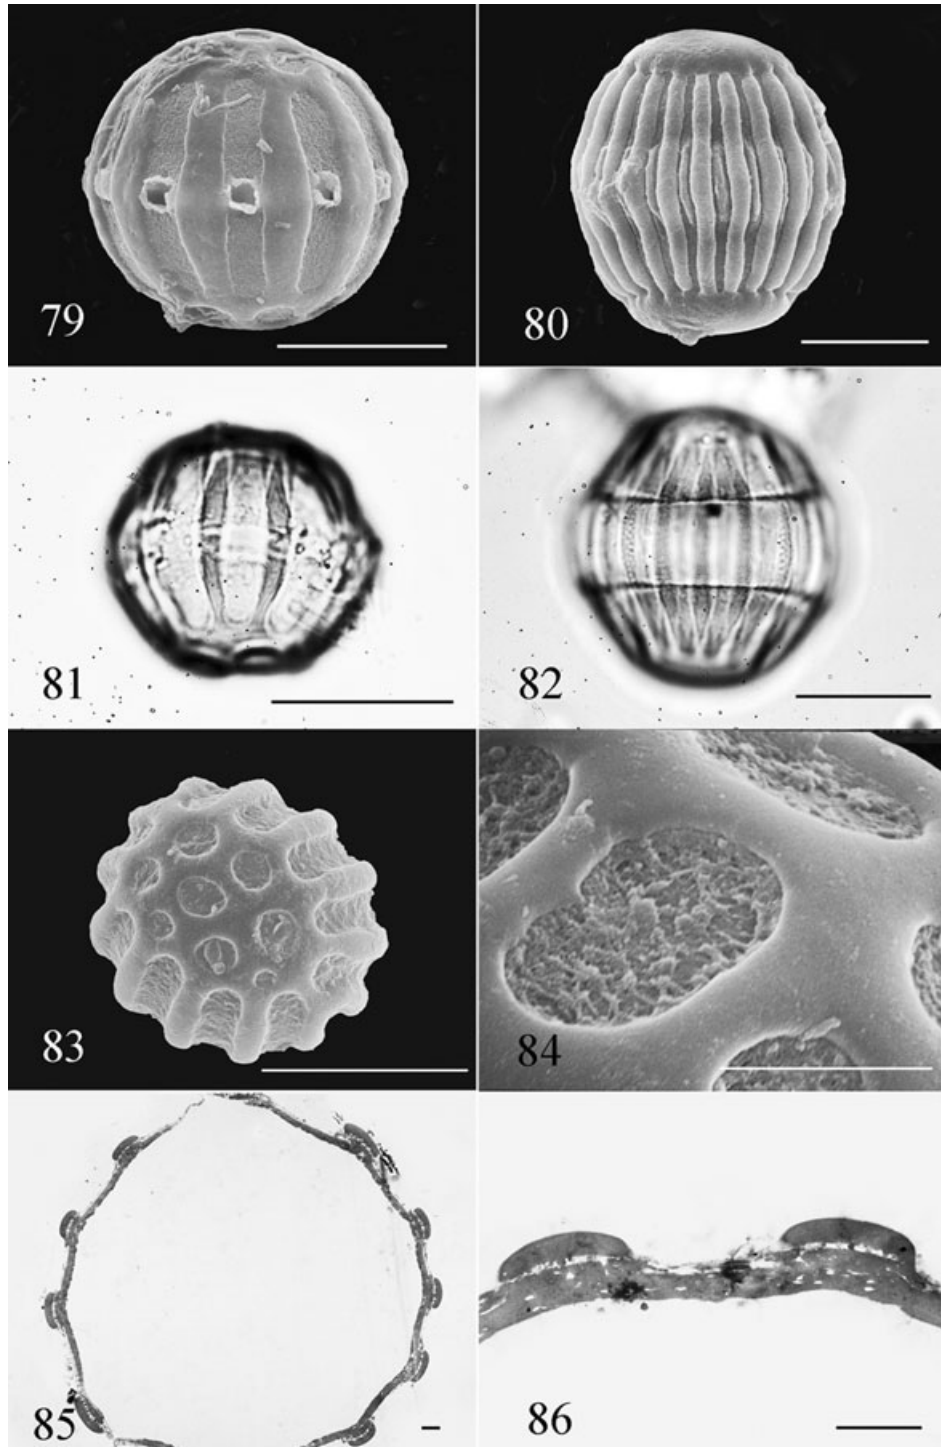

**Figures 79–86.** Fig. 79. *Polygala cruciata*, equatorial view of whole grain (scanning electron microscopy, SEM). Fig. 80. *Polygala meridionalis*, equatorial view of whole grain showing psilate surface ornamentation without lumina in apocolpial regions and opercula over endoapertures (SEM). Fig. 81. *Polygala vulgaris*, equatorial view of whole grain showing endocingulum (light microscopy, LM). Fig. 82. *Polygala meridionalis*, equatorial view of whole grain (LM). Fig. 83. *Polygala vulgaris*, polar view of whole grain showing lumina on apocolpial area and 11 apertures (SEM). Fig. 84. *Polygala vulgaris*, close-up of surface detail showing large lumina (SEM). Fig. 85. *Polygala vulgaris*, transverse section through whole grain (transmission electron microscopy, TEM). Fig. 86. *Polygala vulgaris*, transverse section through mesocolpial wall (TEM). Scale bars: Figs 79–83, 20 µm; Fig. 84, 5 µm; Figs 85, 86, 2 µm.

endoapertures (1)–3.6–(11) × 3–6 µm (Fig. 46 shows endoapertures that are not joined), or endocingulate (Fig. 45). Exine (1)–1.7–(3) µm thick at poles. Surface ornamentation psilate, or, in *B. fuertesii*, sparsely punctate; aperture membrane finely granular, or, in *B. acuminata*, coarsely granular. The margins of the colpus membranes in *B. acuminata* and *B. fuertesii* are edged with coarser granules. In *B. caracasana* and *B. penaea* (Fig. 47), the apocolpia often have a ring of depressions independent of, or joined to, the ectoaperture apices. In thin section (*B. fuertesii*), columellae short and unbranched (0.1 µm); foot layer 0.1 µm in mesocolpial regions; endexine 1 µm with foraminae.

*Subgenus III Hebecarpa* (Chodat) S.F. Blake (= sect. *Hebecarpa* Chodat) (Figs 49–52)

Species examined: *P. obscura*. Pollen isopolar and subprolate–spheroidal in equatorial view;  $P \times E = (36)–38.2–(41) \times (27)–33.7–(35) \mu\text{m}$ ;  $P/E = 1.13$ . Eighteen to 22 apertures, zonocolporate. Ectoapertures (26)–26.8–(28) × (1)–1.2–(2) µm; endoapertures (4)–4.8–(5) µm in length and endocingulate (Fig. 52). Exine 1.5 µm thick at poles. Surface ornamentation psilate–perforate, with lumina up to 1 µm in diameter. In *P. obscura* (Figs 49, 50), the number of lumina present in the apocolpial region varies in one sample from two to numerous. Aperture membrane granular.

*Subgenus IV Acanthocladus* (Klotzsch ex Hassk.) Paiva (= genus *Acanthocladus* Klotzsch ex Hassk.) (Figs 53, 54)

Species examined: *P. klotzschii*. Pollen isopolar and spheroidal in equatorial view;  $P \times E = (24)–26–(27) \times (23)–25.5–(28) \mu\text{m}$ ;  $P/E = 1.02$ . Eight to ten apertures, zonocolporate. Ectoapertures (18)–19.2–(20) × (2)–2.2–(3) µm; endoapertures (4)–4.2–(5) × (4)–5.2–(6) µm, endoapertures are not joined (Fig. 54). Exine 2 µm thick at poles. Surface ornamentation is fossulate in apocolpial and mesocolpial regions (Fig. 53). Aperture membrane granular, the ectoaperture margin has distinctly larger granules.

*Subgenus V Ligustrina* (Chodat) Paiva (= sect. *Ligustrina* Chodat) (Figs 55–60)

Species examined: *P. laureola*, *P. ligustrioides*. Pollen isopolar and prolate in equatorial view;  $P \times E = (74)–82.4–(93) \times (46)–54.6–(61) \mu\text{m}$ ;  $P/E = 1.51$ . Eight to nine apertures, zonocolporate. Ectoapertures (13)–19.2–(27) × (6)–9.5–(10) µm; endoapertures (6)–8.5–(12) µm in length and endocingulate. Exine 3–3.5 µm thick at poles. Surface ornamentation variable: psilate, granular, rugulate, or occasionally microperforate. Aperture membrane coarsely granular (Fig. 59). Opercula may be present (Fig. 59),

although they may be lost during acetolysis. In thin section, infratectum 0.1 µm thick at pole, 0.9 µm thick at equator (*P. ligustrioides*); foot layer 1.3 µm thick (pole) and 2.2 µm thick (equator) and coarsely granular; endexine 0.4 µm at pole with foraminae; endexine at equator sometimes separates behind mesocolpial regions with 0.3 µm of endexine attached to the foot layer and large (8 µm) endexinous protrusions on either side of the endocingulum; foraminae absent in protrusions.

*Subgenus VI Brachytropis* (DC.) Chodat (= sect. *Brachytropis* DC.) (Figs 61, 62)

Species examined: *P. microphylla*. Pollen isopolar and spheroidal in equatorial view;  $P \times E = (36)–38.3–(39) \times (33)–37–(40) \mu\text{m}$ ;  $P/E = 1.03$ . Eleven to 14 apertures, zonocolporate. Ectoapertures (25)–29–(32) × (4)–4.8–(6) µm; endoapertures (5)–5.6–(6) µm in length and endocingulate (Fig. 62). Exine 2.5–3 µm thick at poles. Surface ornamentation finely granular, the lumina that are present in apocolpial areas are either round and less than 1 µm in diameter or elongated forming a reticulate pattern. Aperture membrane granular, larger granules on ectoaperture margin.

*Subgenus VII Gymnospora* (Chodat) Paiva (= sect. *Gymnospora* Chodat)

No material available.

*Subgenus VIII Hebeclada* (Chodat) S.F. Blake (= sect. *Hebeclada* Chodat) (Figs 63–70)

Species examined: *P. hebeclada*, *P. senega*. Pollen isopolar spheroidal in equatorial view;  $P \times E = (31)–34.5–(42) \times (22)–35.5–(44) \mu\text{m}$ ;  $P/E = 0.98$ . Eight to 13 apertures, zonocolporate. Ectoapertures (29)–31.6–(34) × (3)–6.4–(11) µm (*P. senega* has very wide ectoapertures, Figs 67–70); endoapertures (2)–4–(7) × (8)–9.6–(12) µm (*P. senega*, Fig. 70) or endocingulate (*P. hebeclada*, Fig. 66). Exine 1–2 µm thick at poles. Surface ornamentation psilate (Figs 63, 64, 67, 68). Aperture membranes finely granular, ectoaperture margins edged with a line of differing ornamentation.

*Subgenus IX Rhinotropis* (S.F. Blake) Paiva [= subgenus *Chamaebuxus* (DC.) Duch. sect. *Rhinotropis* S.F. Blake]

No material available.

*Subgenus X Chodatia* (= subgenus *Chamaebuxus* sect. *Arillus sensu Chen*) (Figs 71, 72)

Species examined: *P. arillata*. Pollen isopolar and subprolate in equatorial view;  $P \times E = (46)–51.4–(56) \times (39)–43.6–(48) \mu\text{m}$ ;  $P/E = 1.18$ . Seventeen to 18 apertures, zonocolporate. Ectoapertures (28)–30.4–

(34) × (3)–3.4–(5) μm; endoapertures (4)–6.2–(8) μm in length and endocingulate (Fig. 72). Exine 2 μm thick at poles. Surface ornamentation psilate with a ring of depressions present at edge of apocolpial area above ectoaperture apices (Fig. 71). Aperture membrane margins have distinctly larger granules.

*Subgenus X Chodatia continued*

[= subgenus *Pseudosemeiocardium* (Adema)

*J. Chrtek & B. Kisa sect. Villosperma sensu*

*Wu & Chen*] (Figs 73–76)

Species examined: *P. wattersii*. Pollen heteropolar with one larger and one smaller apocolpial region, with one axis shorter than the other, producing a kidney-shaped grain. Oblate in equatorial view;  $P \times E = (30)–36.4–(42) \times (53)–61.2–(65)$  μm;  $P/E = 0.59$ . Seventeen to 21 apertures (Figs 74, 76). Ectoapertures (25)–25.2–(26) × (5)–5.2–(6) μm; endoapertures (7)–8.7–(10) μm and endocingulate. Exine 5 μm thick at poles. *Polygala wattersii* is heteropolar in shape, size, and ornamentation of the apocolpia, as in *Heterosamara*. Small apocolpium has psilate to perforate ornamentation (Figs 75, 76). Large apocolpium has punctate (Fig. 74) to rugulate ornamentation, occasionally with circular regularly spaced lumina around the edge of the apocolpial area above the ectoaperture apices (Fig. 74).

*Subgenus XI Chamaebuxus* (DC.) Duch. (Figs 77, 78)

Species examined: *P. chamaebuxus*. Pollen isopolar and spheroidal in equatorial view;  $P \times E = (50)–55.4–(62) \times (48)–53.8–(60)$  μm;  $P/E = 1.03$ . Sixteen to 18 apertures, zonocolporate. Ectoapertures (37)–42.2–(45) × (5)–5.8–(6) μm; endoapertures (5)–8–(10) μm in length and endocingulate. Exine 1–2 μm thick at poles. Surface ornamentation psilate, aperture membrane granular (Figs 77, 78).

*Subgenus XII Polygala* Duch. (Figs 79–86)

Species examined: *P. cruciata*, *P. macroptera*, *P. meridionalis*, *P. uncinata*, *P. vulgaris*. Pollen isopolar and spheroidal in equatorial view;  $P \times E = (23)–38.4–(57) \times (20)–37.6–(56)$  μm;  $P/E = 1.02$ . Nine to 21 apertures, zonocolporate. Ectoapertures (19)–27.4–(40) × (1)–3.4–(6) μm; endoapertures (1)–6.5–(14) × 5–11 μm or endocingulate. Pollen of *P. macroptera* consistently lacks an endocingulum, the endoapertures appear to be separate [endoaperture width (4)–8–(12) μm]. Some apertures within the sample of *P. uncinata* are also not endocingulate. Exine 1.5–3 μm thick at poles. Surface ornamentation psilate to finely granular, either without [*P. meridionalis* (Fig. 80), *P. uncinata*] or with lumina in apocolpial areas that are small (less than 1 μm in *P. macroptera*) or large [up to 7 μm in *P. cruciata* (Fig. 79) and *P. vul-*

*garis* (Figs 83, 84)]. Aperture membrane variable: psilate in *P. meridionalis*, punctate in *P. uncinata* and *P. cruciata*, finely granular in *P. macroptera*, and coarsely granular in *P. vulgaris*. Ectoaperture margins in *P. macroptera* and *P. uncinata* are edged with distinctly larger granules; in *P. uncinata*, the ectoaperture membranes are psilate in the centre, punctate in the outer areas, and coarsely granular at the edges. Possible presence of opercula in *P. macroptera* and *P. meridionalis* (Fig. 80). In thin section, *P. vulgaris* has short and unbranched (0.1 μm) columellae; the foot layer is indistinct or absent; endexine 0.5–1 μm with foraminae (Fig. 86).

*SALOMONIA* (FIGS 87–90)

Pollen isopolar and prolate spheroidal in equatorial view;  $P \times E = (34)–41.7–(46) \times (35)–40.5–(43)$  μm;  $P/E = 1.03$ . Thirteen or 14 apertures, zonocolporate. Ectoapertures (22)–22.7–(26) × (3)–4.5–(5) μm; endoapertures (2)–5.5–(10) μm and endocingulate (Fig. 87). Exine (1)–1.5–(2) μm thick at poles. Surface ornamentation rugulate (Fig. 88) to verrucate in apocolpial regions; aperture membrane granular. In thin section, columellae c. 0.1 μm; infratectal layer undulating and varying in thickness (Figs 89, 90); foot layer variable in thickness (up to 0.1 μm); endexine 0.6 μm.

*SECURIDACA* (FIGS 91–98)

Pollen isopolar and prolate spheroidal to oblate spheroidal in equatorial view;  $P \times E = (29)–35–(43) \times (31)–36.1–(44)$  μm;  $P/E = 0.95$ . Eight to 13 apertures (Figs 93, 96), zonocolporate. Ectoapertures (22)–28.1–(39) × (2)–2.4–(5) μm; endoapertures (22)–22.7–(26) × (3)–3.5–(5) μm, endoapertures not joined (Figs 91, 97). *Securidaca longipedunculata* is parazygonate, with an apocolpial region that is isolated by a groove linking the ectoaperture apices (Fig. 93). The ectoaperture margins have large granules, and these continue to be present in the groove delimiting the apocolpial region. Exine (1.5)–2.7–(5) μm thick at poles. Surface ornamentation psilate (Fig. 93) to granular (Fig. 92), *S. virgata* is perforate in apocolpial and mesocolpial regions; aperture membrane psilate to granular, operculum present in some samples of *S. longipedunculata* (Figs 93, 94), *S. virgata*, and *S. welwitschii*. In thin section, columellae 0.2 μm; foot layer variable (to 0.5 μm); endexine 1.8 μm with foraminae (Figs 96, 98).

*XANTHOPHYLLUM* (FIGS 99–102)

Pollen isopolar and subprolate to oblate spheroidal in equatorial view;  $P \times E = (20)–31.8–(52) \times (19)–30–(49)$  μm;  $P/E = 1.04$  (*X. vitellinum* is unusual within



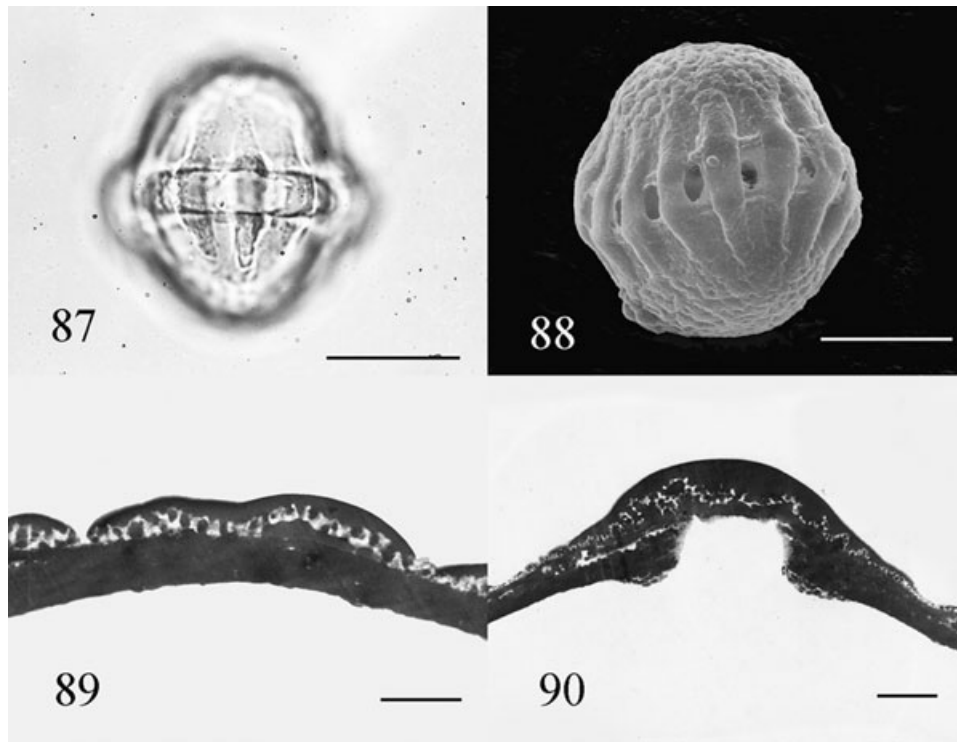

**Figures 87–90.** Fig. 87. *Salomonium ciliata*, equatorial view of whole grain showing endocingulum (light microscopy, LM). Fig. 88. *Salomonium longiciliata*, equatorial view of whole grain showing rugulate apocolpial regions and psilate mesocolpial region (scanning electron microscopy, SEM). Fig. 89. *Salomonium ciliata*, transverse section through polar wall (transmission electron microscopy, TEM). Fig. 90. *Salomonium ciliata*, longitudinal section through mesocolpial wall that overlies endocingulum; note undulating foot layer and infratectal layer (TEM). Scale bars: Figs 87, 88, 20  $\mu\text{m}$ ; Figs 89, 90, 2  $\mu\text{m}$ .

the genus having a subprolate shape). Five to 11 apertures (Fig. 102), *X. papuanam* has the lowest aperture number in Polygalaceae apart from *Balgoya*. Zonocolporate. Ectoapertures (13)–22.7–(40)  $\times$  (1)–1.8–(4)  $\mu\text{m}$ ; endoapertures (3)–5.9–(11)  $\mu\text{m}$  and endocingulate (Figs 100, 101). Exine (1.5)–1.9–(2)  $\mu\text{m}$  thick. Surface ornamentation psilate-punctate (Fig. 99), *X. amoenum* has lumina (less than 1  $\mu\text{m}$  in diameter) with coarsely granular surfaces; aperture membrane granular. In thin section (*X. octandrum*), columellae short and unbranched (0.1  $\mu\text{m}$ ); foot layer thin and discontinuous (less

than 0.05  $\mu\text{m}$ ); polar endexine 0.4  $\mu\text{m}$  with foraminae; equatorial endexine lamellate at endocingulum (1  $\mu\text{m}$  thick), thicker with foraminae adjacent to endocingulum (3  $\mu\text{m}$ ).

## DISCUSSION

The pollen of Quillajaceae and Surianaceae has more in common with that of Leguminosae than with Polygalaceae (Claxton *et al.*, 2005), and the phylogeny resulting from molecular analyses based on three plastid DNA regions (*rbcL*, *trnL* intron, and *trnL-F*

**Figures 91–98.** Fig. 91. *Securidaca diversifolia*, two grains showing polar and equatorial views (light microscopy, LM). Fig. 92. *Securidaca philippinensis*, equatorial view of whole grain showing granular surface ornamentation (scanning electron microscopy, SEM). Fig. 93. *Securidaca longipedunculata*, polar view of whole grain showing ten apertures with opercula visible over some endoapertures, psilate surface ornamentation, and parasyncolpory (SEM). Fig. 94. *Securidaca longipedunculata*, close up of aperture showing operculum present over endoaperture area (SEM). Fig. 95. *Securidaca paniculata*, equatorial view of whole grain (SEM). Fig. 96. *Securidaca longipedunculata*, transverse section showing nine apertures, thick endexine with foraminae, and relatively thin infratectum (TEM). Fig. 97. *Securidaca longipedunculata*, equatorial view of whole grain showing discrete endoapertures (LM). Fig. 98. *Securidaca longipedunculata*, transverse section through wall showing opercula (transmission electron microscopy, TEM). Scale bars: Figs 91–93, 95–97, 20  $\mu\text{m}$ ; Fig. 94, 5  $\mu\text{m}$ ; Fig. 98, 2  $\mu\text{m}$ .

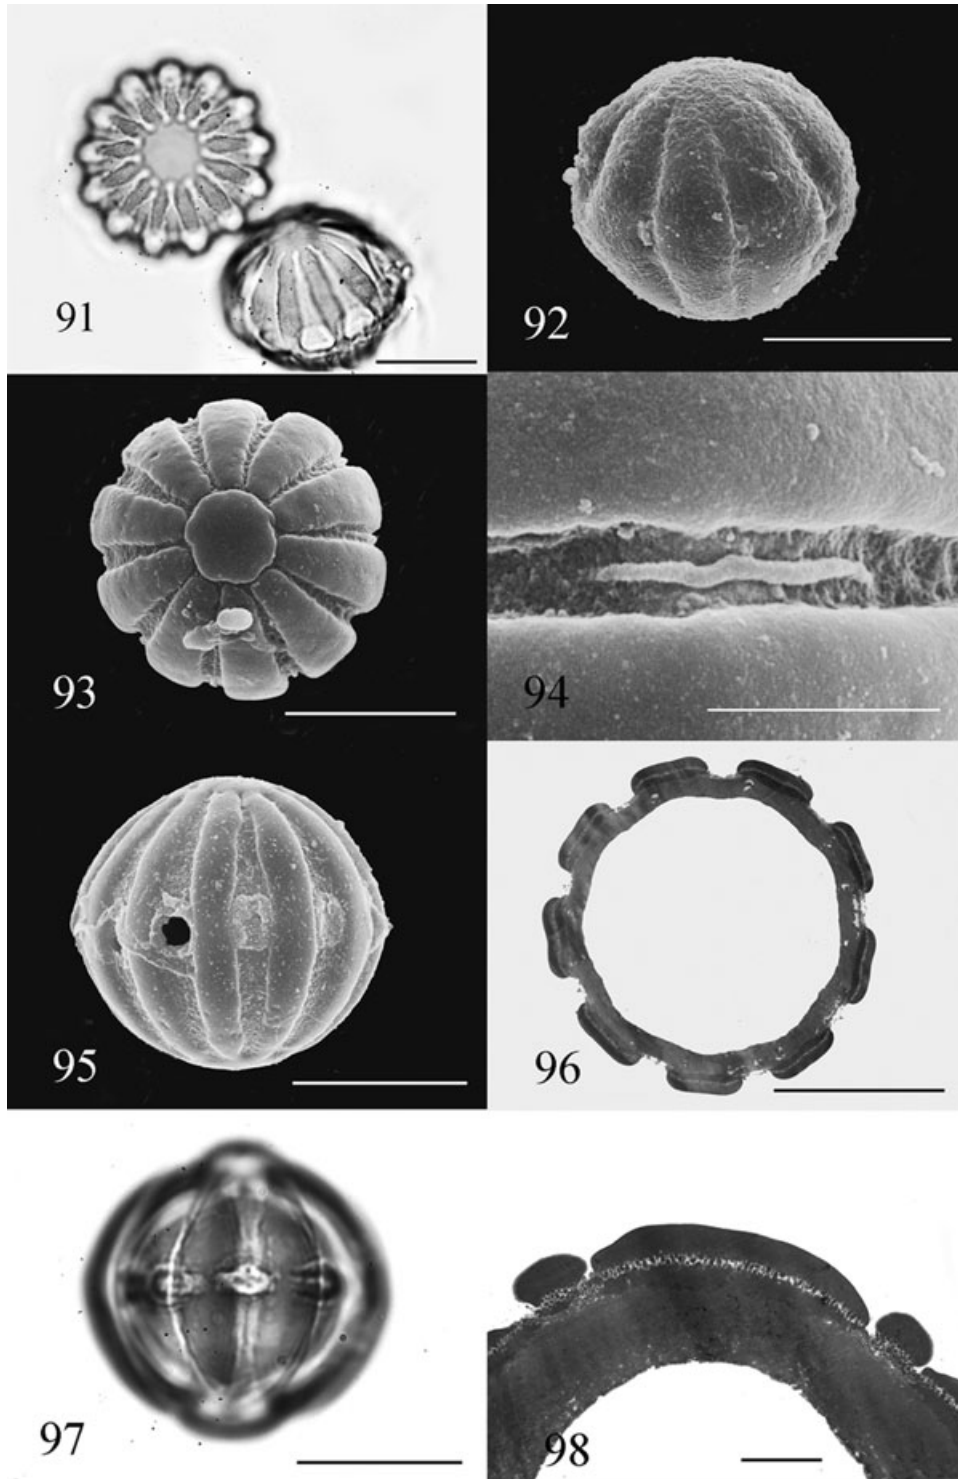

spacer) (Fig. 107) also suggests that the polycolpate condition is characteristic of the Polygalaceae. Within the family, the aperture number shows a high degree of variability within and amongst genera, species, and individual flowers, with ectoapertures (colpi) numbering between five and 33 (Tables 2 and 4) (numbering

three only in *Balgoya*). Labouriau & Morphy (1969) examined colpi number relative to pollen grain size in *Bredemeyera floribunda*, and concluded that there was no relationship (see also Arreguin-Sanchez *et al.*, 1988). This is also the case in our data. Aperture number does, however, broadly correlate with the

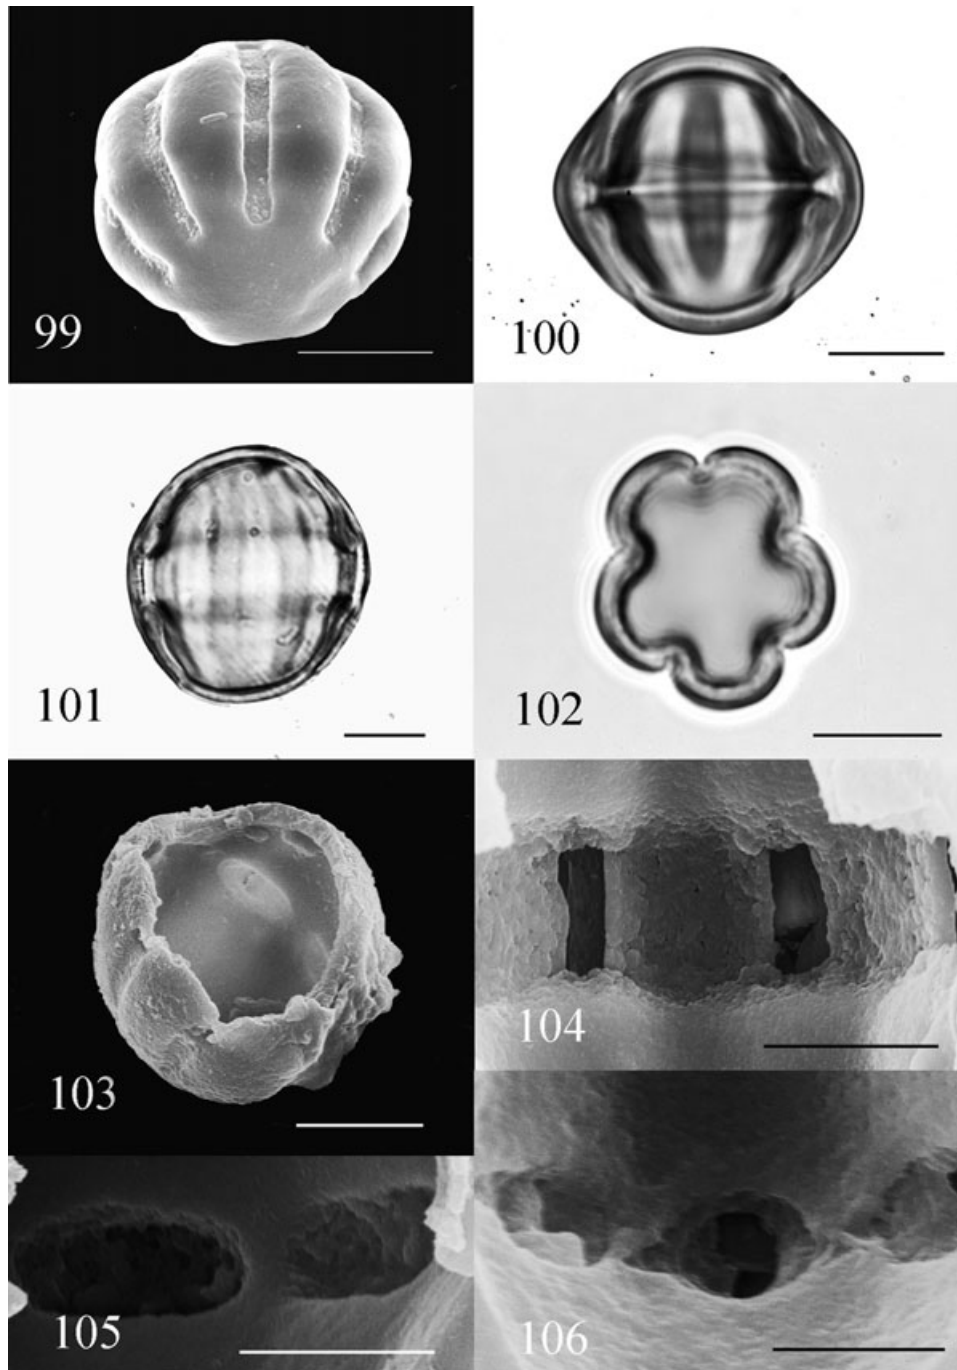

**Figures 99–106.** Fig. 99. *Xanthophyllum octandrum*, oblique polar view of whole grain showing psilate surface ornamentation (scanning electron microscopy, SEM). Fig. 100. *Xanthophyllum affine*, equatorial view of whole grain showing narrow endocingulum (light microscopy, LM). Fig. 101. *Xanthophyllum fragrans*, equatorial view of whole grain showing endocingulum (LM). Fig. 102. *Xanthophyllum papuanum*, polar view of whole grain showing five apertures (LM). Fig. 103. *Securidaca philippinensis*, image of half a pollen grain showing both external and internal surfaces. The internal surface shows lalongate endoapertures that are not joined (SEM). Fig. 104. *Xanthophyllum fragrans*, internal surface of the grain showing endocingulum forming a latitudinal band. The longitudinal spaces occur where the ectoapertures (colpi) pass over the endocingulum (SEM). Fig. 105. *Xanthophyllum amoenum*, internal pollen wall surface showing lalongate endoapertures (SEM). Fig. 106. *Badiera diversifolia* (= *Polygala diversifolia*), internal pollen wall surface showing lalongate endoapertures that are sometimes joined and sometimes not quite joined to each other (SEM). Scale bars: Figs 99–103, 10  $\mu\text{m}$ ; Figs 104–106, 5  $\mu\text{m}$ .



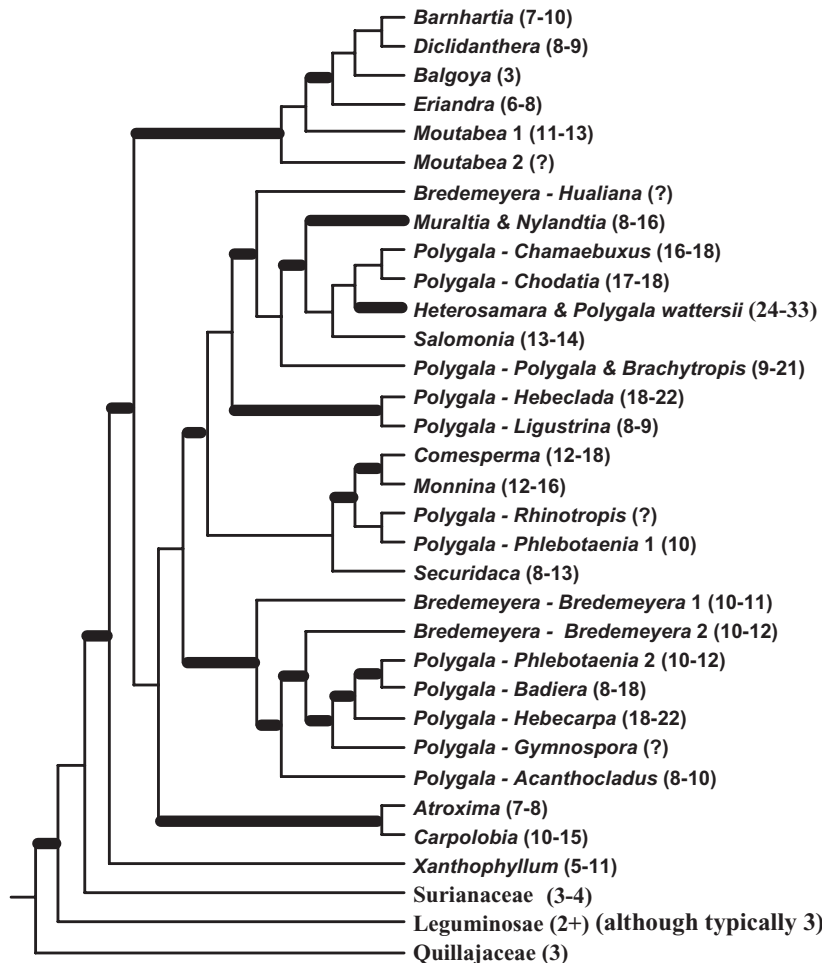

**Figure 107.** Schematic representation of the phylogenetic tree of the Fabales with emphasis on the family Polygalaceae, based on three plastid DNA regions (*rbcL*, *trnL* intron, and *trnL-F* spacer) adapted from Forest *et al.* (2007). Branches which receive bootstrap support greater than 90% are marked in bold. Aperture numbers are indicated in parentheses. Some nonmonophyletic genera are indicated with numerals: *Moutabea* 1, *Mo. guianensis*; *Moutabea* 2, *Mo. acueata* and *Mo. excoriata*; *Phlebotaenia* 1, *Ph. cuneata*; *Phlebotaenia* 2, *Ph. cowelli*; *Bredemeyera* 1, *Br. floribunda*, *Br. altissima*, and *Br. lucida*; *Bredemeyera* 2, *Br. microphylla*.

phylogenetic relationships in Polygalaceae (Persson, 2001; Forest *et al.*, 2007; Fig 107). Early diverging clades in the family have lower aperture numbers than later branching ones. The pollen of Quillajaceae has three apertures, and this family is sister to the rest of the Fabales clade. The next branching family, Leguminosae, has predominantly three-apertured pollen, but there is some variability within the group, with the pollen of some taxa having between one and nine apertures (Banks *et al.*, 2003). In Surianaceae, the genus *Stylobasium* has pollen with three to four apertures (Claxton *et al.*, 2005). In Polygalaceae, pollen of the first branching genus *Xanthophyllum* has between five and 11 apertures. The next branching clade, comprising the genera *Moutabea*, *Eriandra*, *Balgoya*, *Diclidanthera*, and *Barnhartia* (tribe Mouta-

beae), has pollen with three to 13 apertures. *Atoxima* and *Carpolobia* (tribe Carpolobieae) form the next clade, and have seven to 15 apertures. The remaining genera form tribe Polygaleae and comprise the polyphyletic *Polygala* plus *Bredemeyera*, *Comesperma*, *Heterosamara*, *Monnina*, *Muraltia* (including *Nylandtia*), *Salomonina*, and *Securidaca*; they have eight to 33 apertures. An increase in aperture number is characteristic of the whole family. It appears that, in a comparable manner to the successiform trend in Caryophyllaceae, recognized by Van Campo (1976), there has been a pattern of repeated increase in aperture number. In this connection, *Balgoya* merits special attention, being the only genus in the Polygalaceae that has tricolporate pollen. We have included images of the pollen obtained in our study despite the

paucity of material; as a rare monotypic endemic from New Caledonia, few herbarium specimens exist. All available material was examined by us or for us. The genus was first described by Morat & van der Meijden (1991), and pollen has not been described previously because flowers with anthers containing pollen are rarely found. This has led to the conclusion that the species is either dioecious or apomictic (Morat & van der Meijden, 1991). Recent molecular analyses suggest that *Balgoya* is an early branching lineage in the tribe Moutabeae. Its position within the tribe, and as part of a clade that also includes *Barnhartia*, *Diclidanthera*, and *Eriandra*, is secure; however, because of missing sequence data, the precise placement of this genus remains uncertain (Persson, 2001; Forest, 2004; Forest *et al.*, 2007; F. Forest, pers. observ.). Notwithstanding this uncertainty, its position in the phylogeny of Polygalaceae further underlines the repeated trend in other members of the family towards an increase in aperture number.

Within the tribe Moutabeae, the pollen morphology of *Barnhartia* and *Diclidanthera* is very similar (Figs 7–9, 18), and a sister relationship of these two genera is also suggested by molecular analyses (Fig. 107; Persson, 2001).

*Polygala* has a high degree of pollen morphological variation amongst the subgenera, and molecular phylogenetic analyses also suggest that the genus is polyphyletic (Fig. 107; Persson, 2001; Forest, 2004; Forest *et al.*, 2007). The species examined here show some correlation between pollen morphology, the taxonomy of Paiva (1998), and the groups delimited by recent molecular analyses. For example, *P. laureola* and *P. ligustrioides* in subgenus *Ligustrina* have distinctive and very similar pollen morphology (Figs 55–60). However, kidney-shaped pollen, which has previously been thought to be confined to the genus *Heterosamara*, occurs outside the genus as delimited by Paiva (1998), for example in *P. wattersii* (Figs 73–76), *P. arucata*, and *P. triphylla* (Huang, 1968, 1972). Molecular analyses also support a close relationship between *Heterosamara* and *P. wattersii* (F. Forest, pers. observ.). *Polygala wattersii* has previously been placed in different *Polygala* subgenera in various taxonomic treatments (Chen, 1991; Paiva, 1998). The pollen data obtained in this study suggest that *P. wattersii* may be better placed in *Heterosamara*.

The phylogenetic analysis of Forest & Manning (2006) shows that species of genus *Nylandtia* are nested within subgenus *Psiloclada* of genus *Muraltia*, and pollen morphological data also support this result (Figs 33–42).

*Balgoya*, *Diclidanthera*, *Moutabea*, and *Securidaca* have pollen with separate endoapertures. In other taxa, the degree of endoaperture fusion to form endocingula is variable at an infraspecific level

(Figs 103–106; Table 4). The occurrence of lalongate endoapertures, combined with the increased aperture number found in Polygalaceae pollen, would logically lead to an overlap of the endoaperture areas to form endocingula. How this increased area of thin pollen wall around the equator of the grain affects the structural integrity of the pollen, and its function, is at present unknown. Lalongate endoapertures are also present in the pollen of all genera in families Quillajaceae and Surianaceae (Claxton *et al.*, 2005), and in pollen of a few genera of Leguminosae (Ferguson & Skvarla, 1981; Banks & Klitgaard, 2000).

The length of the ectoapertures is variable, particularly within *Polygala*. Relatively short ectoapertures occur in *Epirixanthes*, *Heterosamara*, *P. wattersii*, *P. ligustrioides*, and *P. laureola* (this study), and have been reported in *P. leptalea* (Sumithraarachchi, 1982). Opercula have been found in *Securidaca virgata*, *S. longipedunculata* (Fig. 94), and *S. welwitschii*, and possibly also in *Epirixanthes elongata*, *P. macroptera*, and *P. meridionalis* (Table 4). In the literature, opercula have been found in *S. longipedunculata* (Coetzee & Robbertse, 1985), *P. reinii* (Ikuse, 1956), *P. microphylla* (Villneuva & Ramos, 1986), and *P. alba*, *P. appressipilis*, and *P. mexicana* (Arreguin-Sanchez *et al.*, 1988). It is possible that opercula may be more widespread than is currently documented. Loss of these structures during acetolysis may make them difficult to recognize once specimens have been prepared. The presence of opercula in unacetolysed Polygalaceae pollen may make an interesting topic for further study.

A margin of differing ornamentation around the ectoapertures occurs in *Comesperma ericinum*, *Co. hispidulim*, *Co. virgatum*, *Co. volubile*, *Heterosamara cabrae*, *H. carrssoana*, *H. tatarinowii*, *Muraltia serpyllodes*, *Nylandtia spinosa*, *Badiera fuertesii*, *P. acuminata*, *P. cunneata*, *P. klotzschii*, *P. microphylla*, *P. hebeclada*, *P. senega*, *P. arillata*, *P. macroptera*, *P. uncinata*, and *S. longipedunculata* (Table 4). Other taxa with larger granules around the margin of the aperture membrane are *P. cymosa* and *P. ramosa* (the ornamentation around the margin was described as verrucate by Jones *et al.*, 1995). In some instances, this margin appears to be formed from a different layer of the pollen wall (Figs 24, 25).

*Securidaca longipedunculata* is the only species in Polygalaceae known to have parasyncolpate pollen (Fig. 93), although some species of *Polygala* examined in this study have indentations or other sculptural patterns in or around the apocolpial area (Figs 47, 49, 63, 71, 80). Pollen of the genera *Tetraberlinia*, *Tamarindus*, and *Aphanocalyx* (Banks & Klitgaard, 2000) of the legume subfamily Caesalpinioideae has been documented to be parasyncolporate. Syncolporate pollen has not been found in Polygalaceae, Surianaceae, or Quillajaceae (Claxton *et al.*, 2005). It is,

however, present in the two legume subfamilies Caesalpinioideae (Graham & Barker, 1981; Banks & Klitgaard, 2000; Banks *et al.*, 2003) and Papilionoideae (Ferguson & Skvarla, 1981), where this character has been found to be polymorphic at both the infrageneric and infraspecific level (Banks *et al.*, 2003).

It is primarily the large number of apertures in Polygalaceae that makes the pollen of this family distinct from that of the other closely related families Leguminosae, Surianaceae, and Quillajaceae. This presents an interesting phenomenon, very comparable with the successiform trend identified by Van Campo (1976) in the pollen of Caryophyllales. How this pattern of increasing aperture number is mediated developmentally, and what are the implications for harmomegathic or germination processes, deserves further study.

#### ACKNOWLEDGEMENTS

We would like to thank Michael Hesse and Raymond van der Ham for their thorough reviews of the manuscript.

#### REFERENCES

- Aldridge J. 1842.** Memoir to determine the use of pollen in natural classification. *Journal of Botany* **1**: 575–601.
- Angiosperm Phylogeny Group (APG) II. 2003.** An update of the Angiosperm Phylogeny Group classification for the orders and families of flowering plants: APG II. *Botanical Journal of the Linnean Society* **141**: 399–436.
- Arachi JX. 1968.** Pictorial presentation of Indian flora: special study. Madras: Courtalam.
- Arreguin-Sanchez ML, Palacios-Chavez R, Quiroz-Garcia DL, Ramos-Zamora D. 1988.** Morfología de los granos de polen de la familia Polygalaceae del Valle de Mexico. *Acta Botanica Mexicana* **4**: 21–27.
- Aymard GA, Berry PE. 1997.** A new species of *Diclidanthera* (Polygalaceae) from the Venezuelan Guayana. *Biollania* **6**: 191–194.
- Banks H, Klitgaard BB. 2000.** Palynological contributions to the systematics of the detarioid legumes (Leguminosae: Caesalpinioideae). In: Herendeen PS, Bruneau A, eds. *Advances in legume systematics part 9*. London: Royal Botanic Gardens Kew, 79–106.
- Banks H, Klitgaard BB, Lewis GP, Crane PR, Bruneau A. 2003.** Pollen and the systematics of tribes Caesalpinieae and Cassieae (Caesalpinioideae: Leguminosae). In: Klitgaard BB, Bruneau A, eds. *Advances in legume systematics part 10, higher level systematics*. London: Royal Botanic Gardens Kew, 95–122.
- Bello MA, Hawkins JA, Rudall PJ. 2007.** Floral morphology and development in Quillajaceae and Surianaceae (Fabales), the species-poor relatives of Leguminosae and Polygalaceae. *Annals of Botany*. doi: 10.1093/aob/mcm228
- Bernardi L. 2000.** *Consideraciones taxonomicas y fitogeograficas acerca de 101 Polygalae Americanas*. *Cavanillesia Altera*, Vol. 1. Madrid: Real Jardín Botánico.
- Blackmore S, Barnes SH. 1986.** Harmomegathic mechanisms in pollen grains. In: Blackmore S, Ferguson IK, eds. *Pollen and spores: form and function*. London: Academic Press, 137–149.
- Bonnefille R, Riollet G. 1980.** *Pollens des savannes d'Afrique orientale*. Paris: CNRS.
- Braga R. 1961.** Notas palinológicas III. Contribuição ao estudo da morfologia polínica do genero *Polygala* L. (nota previa). *Tribuna Farmaceutica* **29**: 54–55.
- Breteler FJ, Smislaert-Houwing AAS. 1977.** *Revision of Atroxima Stapf and Carpolobia G.Don (Polygalaceae)*. Wageningen Landbouwhogeschool Mededelingen; 77-18. Wageningen: H. Veenman en Zonen B.V.
- Brummitt RK. 1992.** *Vascular plant families and genera*. London: Royal Botanic Gardens Kew.
- Chauhan MS, Bera SK. 1990.** Pollen morphology of some important plants of tropical deciduous Sal forest, District Sidhi, Madhya Pradesh. *Geophytology* **20**: 30–36.
- Chen SK. 1991.** A taxonomic study on the genus *Polygala* L. in China (translated from Chinese). *Acta Phytotaxonomica Sinica* **29**: 193–229.
- Chodat RH. 1896.** Polygalaceae. In: Engler A, Prantl E, eds. *Natürliche Pflanzenfamilien*. Leipzig: Wilhelm Engelmann, 323–345.
- Claxton F, Banks H, Klitgaard BB, Crane PR. 2005.** Pollen morphology of families Quillajaceae and Surianaceae (Fabales). *Review of Palaeobotany and Palynology* **133**: 221–233.
- Coetzee H, Robbertse PJ. 1985.** Pollen and tapetal development in *Securidaca longepedunculata*. *South African Journal of Botany* **51**: 111–124.
- De Leonardis W, Matarese Palmieri R, Rpsitto M, Zizza A. 1989.** Contributo all conoscenza di taxa endemici della Sicilia athaverso l'analisi morfobiotrica del polline. *Acta Botanica Malacitana Malaga* **14**: 117–129.
- Dimbleby G. 1967.** *Plants and archaeology*. London: John Baker.
- Doyle JJ, Chapill JA, Bailey DC, Kajita T. 2000.** Towards a comprehensive phylogeny of legumes: evidence from *rbcL* sequences and non-molecular data. In: Herendeen PS, Bruneau A, eds. *Advances in legume systematics part 9*. London: Royal Botanic Gardens Kew, 1–20.
- Dumort BCJ. 1823.** *Nylandtia. Commentationes Botanicae*. Tournay: Ch. Casterman-Dieu, 31–32.
- Edgeworth MP. 1877.** *Pollen*. London: Hardwicke and Bogue.
- El Ghazali GEB. 1989.** A study on the pollen flora of Sudan with special reference to pollen identification. Thesis 3, Botanisk Institutt Universitetet I, Bergen.
- Erdtman G. 1943.** *An introduction to pollen analysis*. New York: The Ronald Press Co.
- Erdtman G. 1952.** *Pollen morphology and plant taxonomy – angiosperms*. Stockholm: Almqvist and Wiksell.
- Erdtman G. 1960.** The acetolysis method, revised description. *Svensk Botanisk Tidskrift* **54**: 561–564.



- Erdtman G. 1969.** *Handbook of palynology*. Copenhagen: Munksgaard.
- Eriksen B. 1993.** Phylogeny of the Polygalaceae and its taxonomic implications. *Plant Systematics and Evolution* **186**: 33–55.
- Eriksen B, Staahl B, Persson C. 2000.** Polygalaceae. In: Harling G, Andersson L, eds. *Flora of Ecuador*. Gothenburg: University of Gothenburg, 10–12.
- Ferguson IK. 1987.** A preliminary survey of the pollen exine stratification in the Caesalpinioideae. In: Stirton CH, ed. *Advances in legume systematics part 3*. London: Royal Botanic Gardens Kew, 354–384.
- Ferguson IK, Skvarla JJ. 1981.** The pollen morphology of the subfamily Papilionoideae (Leguminosae). In: Polhill RM, Raven PH, eds. *Advances in legume systematics part 2*. London: Royal Botanic Gardens Kew, 859–896.
- Forest F. 2004.** Systematics of Fabales and Polygalaceae, with emphasis on *Muraltia* and the origin of the Cape flora. PhD Thesis, University of Reading.
- Forest F, Chase MW, Persson C, Crane PR, Hawkins JA. 2007.** The role of biotic and abiotic factors in evolution of ant-dispersal in the milkwort family (Polygalaceae). *Evolution* **61–7**: 1675–1694.
- Forest F, Manning JC. 2006.** Evidence for inclusion of South African endemic *Nylandtia* in *Muraltia* (Polygalaceae). *Systematic Botany* **33**: 525–532.
- Fredoux A. 1977.** Etude morphologique des pollens de 32 espèces des formations périlagunaires de basse Côte d'Ivoire (lagune Adjin). *Candollea* **32**: 281–303.
- Furness SH, Stafford PJ. 1995.** Polygalaceae. The North-west European Pollen Flora 55. *Review of Palaeobotany and Palynology* **88**: 61–82.
- Gibbs PE, Ferguson IK. 1987.** Correlations between pollen exine sculpturing and angiosperm self-incompatibility systems – a reply. *Plant Systematics and Evolution* **155**: 143–159.
- Gleason HA. 1926.** *Barnhartia*. *Bulletin of the Torrey Botanical Club* **53**: 297–199.
- Goldblatt P, Manning J. 2000.** *Cape plants: a conspectus of the Cape flora of South Africa* (Strelitzia, 9). Pretoria: National Botanical Institute of South Africa.
- Graham A. 1963.** Palynology. With special reference to palynological studies in Michigan. *Michigan Botanist* **2**: 35–44.
- Graham A, Barker G. 1981.** Palynology and tribal classification in the Caesalpinioideae. In: Polhill RM, Raven PH, eds. *Advances in legume systematics part 2*. London: Royal Botanic Gardens Kew, 801–834.
- Gupta HP, Sharma C. 1986.** *Pollen flora of North West Himalaya*. Lucknow: Indian Association of Palinostratigraphers.
- van der Ham RWJM. 1988.** Palynology. In: Polygalaceae (by van der Meijden R), van Steenis CGGJ, de Wilde JJO, eds. *Flora Malesiana, sér. 1*, Vol. 10, part 3. London: Kluwer Academic Publishers, 608–609.
- Hsieh CF, Hsieh TH, Lai IL. 1995.** *Epirixanthes elongata* Bl.: a new record to the flora of Taiwan. *Taiwania* **40**: 381–384.
- Huang TC. 1968.** Pollen grains of Formosan plants. *Taiwania* **14**: 133–270.
- Huang TC. 1972.** *Pollen flora of Taiwan*. Taiwan: National Taiwan University Botany Department Press.
- Ikuse M. 1956.** *Pollen grains of Japan*. Tokyo: Hirokawa Publishing Co.
- Jain RK, Nanda S. 1966.** Pollen morphology of some desert plants Pilani, Rajasthan. *Palynological Bulletin Lucknow* **3**: 56–69.
- Jones GD, Bryant VM, Lieux MH, Jones SD, Lingren PD. 1995.** *Pollen of the southeastern United States: with emphasis on melissopalynology and entomopalynology*. Texas: American Association of Stratigraphic Palynologists Foundation, Series 30.
- Kajita T, Ohashi H, Tateishi Y, Bailey CD, Doyle JJ. 2001.** *rbcL* and legume phylogeny, with particular reference to Phaseoleae, Millettieae and allies. *Systematic Botany* **26**: 515–536.
- Källersjö M, Farris JS, Chase MW, Bremer B, Fay MF, Humphries CJ, Petersen G, Seberg O, Bremer K. 1998.** Simultaneous parsimony jackknife analysis of 2538 *rbcL* sequences reveals support for major clades of green plants, land plants, seed plants and flowering plants. *Plant Systematics and Evolution* **213**: 259–287.
- Kantha S, Prasad NSS. 1989.** Pollen morphological studies of the genus *Polygala* Linn. *Indian Journal of Botany* **12**: 55–57.
- Koyama H. 1995.** A revision of the genus *Salomonina* (Polygalaceae). *Bulletin of the National Science Museum of Tokyo* **21**: 1–12.
- Labouriau MLS. 1973.** *Contribuição à palinologia dos Cerrados*. Rio de Janeiro: Estudado pela Academia Brasileira de Ciências.
- Labouriau MLS, Morphy L. 1969.** Pollen grains of plants of the 'Cerrado' – XVI. Myrsinaceae, Ochnaceae and Polygalaceae. *Anais da Academia Brasileira de Ciências* **41**: 249–258.
- Larson DA, Skvarla J. 1961.** The morphology and fine structure of pollen of *Polygala alba* Nutt. & *P. incarnata* L. *Pollen et Spores* **3**: 21–32.
- Lobreau-Callen D, Oltmann O, Straka H. 1975.** Palynologia Madagassica et Mascarenica. Fam. 99–110. *Pollen et Spores* **17**: 11–57.
- Lobreau-Callen D, Straka H, Friedrich B. 1984.** Fam. 99–110. Microscopie électronique à balayage et addenda. In: Straka H, ed. *Palynologia Madagassica et Mascarenica. Addenda und REM*, 27–51.
- Mabberley DJ. 1997.** *The plant-book*, 2nd edn. Cambridge: Cambridge University Press.
- Marques MdoCM. 1980.** Revisao das especies do genero *Bredemeyera* Willd. (Polygalaceae) do Brasil. *Rodriguesia* **32**: 269–321.
- van der Meijden R. 1982.** *Systematics and evolution of Xanthophyllum (Polygalaceae)*. Leiden Botanical Series, Vol. 7. Leiden: E.J.Brill/Leiden University Press.
- van der Meijden R. 1988.** Polygalaceae. In: van Steenis CGGJ, de Wilde JJO, eds. *Flora Malesiana, sér. 1*, Vol. 10, part 3. London: Kluwer Academic Publishers, 455–539.

- Mohl H. 1835.** Sur la structure et les formes des graines de pollen. *Annales des Sciences Naturelles Sér. 2* **3**: 148–180, 220–236, 304–346.
- Moore PD, Webb JA. 1978.** *An illustrated guide to pollen analysis*. Kent: Hodder & Stoughton Ltd.
- Moore PD, Webb JA, Collinson ME. 1991.** *Pollen analysis*, 2nd edn. Oxford: Blackwell Scientific Publications.
- Morat P, van der Meijden R. 1991.** *Balgoya* (Polygalaceae trib. Moutabeae), a new genus from New Caledonia. Bulletin of the Museum of Natural History, Paris Series 4 (13) section B. *Adansonia* **1–2**: 3–8.
- Morgan DR, Soltis DE, Robertson KR. 1994.** Systematic and evolutionary implications of *rbcl* sequence variation in Rosaceae. *American Journal of Botany* **81**: 890–903.
- Muller J. 1979.** Form and function in angiosperm pollen. *Annals of the Missouri Botanical Gardens* **66**: 593–632.
- Nair PKK. 1965.** *Pollen grains of western Himalayan plants*. London: Asia Publishing House.
- Nakamura J. 1980.** Diagnostic characters of pollen grains of Japan – I & II. *Special Publications from the Osaka Museum of Natural History* **12–13**: 37, pl. 71, 72 (in Japanese).
- Nauman CE. 1981.** *Polygala grandiflora* Walter (Polygalaceae) re-examined. *Sida* **9**: 1–18.
- Paiva JAR. 1998.** Polygalarum Africanarum et Madagascarensium prodromus atque gerontogaei generis *Hetrosamara* Kuntze, a genere *Polygala* L. segregate et a nobis denuo recepti, synopsis monographica. *Fontqueria* **50**: 1–346.
- Paiva J, Santos Dias JD. 1990.** The pollen grain of *Polygala fruticosa* Berg. (Polygalaceae). *Anales del Jardín Botánico de Madrid* **47**: 377–385.
- Palacios-Chávez R, Arreguín-Sánchez ML, Quiroz-García DL. 1990.** Flora polínica de Chamela, Jalisco (Familias Alismaceae, Anacardiaceae, Begoniaceae, Bixaceae, Cochlospermaceae, Hernandiaceae y Polygalaceae). *Cuadernos de Trabajo, INAH* **42**: 95–112.
- Pedley L. 1984.** A revision of *Comesperma* (Polygalaceae) in Queensland. *Austrobaileya* **2**: 7–14.
- Pendry CA. 2001.** Polygalaceae. In: Santisuk T, Larsen K, eds. *Flora of Thailand*, Vol. 7. Bangkok: The Royal Forest Department, 498–538.
- Pereira AL. 1942.** Sobre o citoplasma e a membrana da célula vegetal. I – Substancias nao cromáticas e a reaccao fe Feulgen. *Boletim da Sociedade Broteriana* **16**: 153–158.
- Pereira AL. 1943.** Sobre o citoplasma e a membrana da célula vegetal. II – Microscopos e outras células, plastos e outras formacoes celulares perante e reaccao de Feulgen. *Boletim da Sociedade Broteriana* **17**: 167–181.
- Persson C. 2001.** Phylogenetic relationships in the Polygalaceae based on plastid DNA sequences from the *trnL-F* region. *Taxon* **50**: 763–779.
- Perveen A, Ali T, Qaiser M. 1994.** Pollination types and pollen characters within flora of Karachi. *Pakistan Journal of Botany* **26**: 35–56.
- Punt W, Blackmore S, Nilsson S, Le Thomas A. 1994.** *Glossary of pollen and spore terminology*. Utrecht: LPP Foundation.
- Reille M. 1995.** *Pollen et Spores d'Europe et d'Afrique du Nord*. Marseille: Laboratoire de Botanique Historique et Palynologie.
- Roubik DW, Moreno JE. 1991.** *Pollen and spores of Barro Colorado Island*. Monographs in Systematic Botany from the Missouri Botanic Garden 36. Missouri: Missouri Botanic Garden.
- van Royen P, van Steenis CGGJ. 1952.** *Eriandra*, a new genus of Polygalaceae from New Guinea. *Journal of the Arnold Arboretum* **33**: 91–94.
- Savolainen V, Fay M, Albach DC, Backlund A, Van der Bank M, Cameron KM, Johnson SA, Lledo MD, Pintaud C, Powell M, Sheahan MC, Soltis DE, Soltis PS, Weston P, Whitton WM, Wurdack MC, Chase MW. 2000.** Phylogeny of the eudicots: a nearly complete familial analysis based on *rbcl* gene sequences. *Kew Bulletin* **55**: 257–309.
- Simpson BB, Skvarla JJ. 1981.** Pollen morphology and ultrastructure of *Krameria* (Krameriaceae): utility in question of intrafamilial and interfamilial classification. *American Journal of Botany* **68**: 277–294.
- Skvarla JJ. 1966.** Techniques of pollen and spore electron microscopy. Part I. – Staining, dehydration, and embedding. *Oklahoma Geological Notes* **26**: 179–186.
- Sladkov AN. 1967.** *Introduction to sporo-pollinique analysis*. Moscow: Publishing House, Nauka (in Russian).
- Soltis DE, Soltis PS, Chase MW, Mort ME, Albach DC, Zanis M, Savolainen V, Hahn WH, Hoot SB, Fay M, Axtell M, Swensen SM, Prince LM, Kress JW, Nixon KC, Farris JS. 2000.** Angiosperm phylogeny inferred from 18S *rDNA*, *rbcl*, and *atpB* sequences. *Botanical Journal of the Linnean Society* **133**: 381–461.
- Straka H. 1975.** Palynologia madagassica et Mascarenica. Fam. 109–110. *Pollen et Spores* **17**: 52–53; 56–57.
- Sumithraarachchi DB. 1982.** *Study of the family Polygalaceae in Sri Lanka*. Reading: Reading University.
- Tissot C, Chikhi H, Nayar TS. 1994.** *Pollen of wet evergreen forests of the Western Ghats, India*. Pondichery: Publications du Departement d'Ecologie Institut Francais de Pondichery.
- Ubera JL, Diez MJ. 1994.** Estudio del sistema apertural y estructura de la esporodermis en *Polygala* L. In: Ollivier MD, Andrés IM, Moreno MEB, Heras JG, eds. *Polen y esporas: contribución a su conocimiento*. Tenerife: VIII Simposio de Palinología (A.P.L.E.), 125–130.
- Van Campo M. 1958.** Palynologie africaine II. *Bulletin de l'Institut Française d'Afrique Noire* **20**: 753–760.
- Van Campo M. 1976.** Patterns of pollen morphological variation within taxa. In: Ferguson IK, Muller J, eds. *The evolutionary significance of the exine*. London: Academic Press, 125–137.
- Villnueva E, Ramos A. 1986.** Contribución al estudio polínico de *Polygala* L. (Polygalaceae) en la Península Ibérica. *Anales del Jardín Botánico de Madrid* **42**: 377–388.
- Wang FH. 1960.** *Pollen grains of China*. [In Chinese].
- Wendt T. 2000.** *Moutabea gentryi* (Polygalaceae), a new species of liana from Central America and Colombia. *Lundellia* **3**: 6–12.
